# Supplementary material for: N6‐Methyladenosine Modification Profile in Bovine Mammary Epithelial Cells Treated with Heat‐Inactivated Staphylococcus aureus
Source: Hindawi journal article supplement (doi:10.1155/2022/1704172), 2022-01-01
Supplement: f1 [file 1704172.f1.zip]

**Table S2. Differential mRNA expression for: *S. aureus* \_vs\_ Con**

| Gene_id      | logFC    | P Value  | Regulation | Gene_id      | logFC     | P Value  | Regulation |
|--------------|----------|----------|------------|--------------|-----------|----------|------------|
| ADGRE3       | 6.486036 | 8.04E-05 | up         | FBN1         | -8.47045  | 5.08E-08 | down       |
| STARD7       | 6.333711 | 0.000237 | up         | MYH11        | -8.14671  | 5.39E-07 | down       |
| TRIP11       | 6.198409 | 7.93E-05 | up         | ACP2         | -7.79738  | 4.6E-06  | down       |
| NTRK1        | 6.062762 | 0.000433 | up         | PRR29        | -7.706764 | 9.69E-06 | down       |
| KRT80        | 6.019798 | 0.000639 | up         | LOC112444598 | -7.592669 | 1.02E-05 | down       |
| LOC527796    | 6.005688 | 0.000884 | up         | CHRNA1       | -7.551493 | 2.75E-05 | down       |
| RAB4B        | 5.879879 | 0.001578 | up         | PSIP1        | -7.41187  | 0.00012  | down       |
| MAPKBP1      | 5.847415 | 0.001712 | up         | DXO          | -7.372946 | 4.4E-05  | down       |
| PHOSPHO2     | 5.811408 | 0.001441 | up         | DSG1         | -7.293155 | 0.000244 | down       |
| LOC100849008 | 5.810101 | 0.001884 | up         | GLS          | -7.25391  | 0.000264 | down       |
| ARRDC1       | 5.781697 | 0.00255  | up         | CD70         | -7.242189 | 0.000312 | down       |
| TBC1D24      | 5.781697 | 0.00255  | up         | BCKDHA       | -7.209064 | 0.000191 | down       |
| RRM2         | 5.781697 | 0.00255  | up         | LOC509006    | -7.172094 | 0.000358 | down       |
| CASS4        | 5.781697 | 0.00255  | up         | LOC112445660 | -7.157447 | 0.000292 | down       |
| RNF170       | 5.652885 | 0.003358 | up         | LOC112444345 | -7.050033 | 0.000444 | down       |
| DEPDC7       | 5.611438 | 0.003648 | up         | IFN-tau-c1   | -7.038792 | 0.00033  | down       |
| CENPT        | 5.611438 | 0.003648 | up         | LHFPL4       | -7.032866 | 0.000651 | down       |
| CNPY3        | 5.611438 | 0.003648 | up         | DDX39A       | -7.027795 | 0.000708 | down       |
| GTF3C2       | 5.611438 | 0.003648 | up         | TMEM242      | -7.027778 | 0.000542 | down       |
| TRMT13       | 5.611438 | 0.003648 | up         | INPP4A       | -6.994488 | 0.000673 | down       |
| SLC2A1       | 5.579115 | 0.00066  | up         | KMT2E        | -6.959519 | 0.000556 | down       |
| EXT1         | 5.563658 | 0.00251  | up         | PRPF38A      | -6.94627  | 0.000947 | down       |
| STK40        | 5.559045 | 0.004067 | up         | TNK1         | -6.929564 | 0.000843 | down       |
| RGS19        | 5.559045 | 0.004067 | up         | FAM186B      | -6.895752 | 0.001088 | down       |
| CDC23        | 5.559045 | 0.004067 | up         | IFNT2        | -6.876103 | 0.000921 | down       |
| ZNF446       | 5.522388 | 0.005451 | up         | PMEL         | -6.855888 | 0.001024 | down       |
| POLR2K       | 5.489806 | 0.005755 | up         | CEACAM16     | -6.855686 | 0.001157 | down       |
| ABCA4        | 5.379293 | 0.006882 | up         | CDAN1        | -6.781825 | 0.001225 | down       |
| NTRK2        | 5.365955 | 3.79E-22 | up         | SPSB3        | -6.767118 | 0.001325 | down       |
| PHYHD1       | 5.349989 | 0.005813 | up         | CMTM4        | -6.763585 | 0.000721 | down       |
| SS18L1       | 5.348969 | 0.007238 | up         | MUTYH        | -6.737135 | 0.001833 | down       |
| BMP1         | 5.347172 | 0.004792 | up         | LOC101906182 | -6.710815 | 0.001397 | down       |
| DNAH5        | 5.313952 | 0.007653 | up         | ZBTB26       | -6.701327 | 0.001986 | down       |
| RNF185       | 5.303605 | 0.007785 | up         | SLC12A5      | -6.678912 | 0.002202 | down       |
| KLF13        | 5.213776 | 0.017491 | up         | IFNT3        | -6.67316  | 0.00176  | down       |
| ADAMTS10     | 5.213776 | 0.017491 | up         | LRRC57       | -6.636499 | 0.001529 | down       |
| LOC511695    | 5.213776 | 0.017491 | up         | PALLD        | -6.627274 | 0.001462 | down       |
| ARHGEF10L    | 5.213776 | 0.017491 | up         | ARG2         | -6.623666 | 0.002115 | down       |
| LIAS         | 5.213776 | 0.017491 | up         | CCDC146      | -6.619334 | 0.002288 | down       |
| CENPE        | 5.213776 | 0.017491 | up         | KIF9         | -6.569849 | 0.003153 | down       |
| CCDC171      | 5.213776 | 0.017491 | up         | FBXO24       | -6.558497 | 0.002554 | down       |
| CCDC127      | 5.213776 | 0.017491 | up         | FAM210A      | -6.557049 | 0.002665 | down       |
| KCTD5        | 5.196963 | 0.007539 | up         | SAP18        | -6.555771 | 0.003062 | down       |
| ALK          | 5.186728 | 1.52E-07 | up         | CADM4        | -6.554194 | 0.002456 | down       |
| LRCH1        | 5.158959 | 0.018354 | up         | KLHL7        | -6.530291 | 0.003534 | down       |
| MRPS35       | 5.128358 | 0.018839 | up         | SLC26A1      | -6.508133 | 0.003275 | down       |
| CEP55        | 5.103088 | 0.019264 | up         | SUPT7L       | -6.501865 | 0.002675 | down       |
| DAB2         | 5.103088 | 0.019264 | up         | SLC25A51     | -6.498936 | 0.003473 | down       |
| DNAJB6       | 5.103088 | 0.019264 | up         | LOC112442246 | -6.493661 | 0.00391  | down       |
| MMP9         | 5.047204 | 0.006541 | up         | FNDC10       | -6.487859 | 0.003132 | down       |
| MAP3K2       | 5.046789 | 0.006973 | up         | TUBGCP4      | -6.451858 | 0.004216 | down       |
| MEAF6        | 5.046125 | 0.001813 | up         | OAZ2         | -6.432691 | 0.003886 | down       |
| IRF2BP1      | 5.044854 | 0.009566 | up         | TAF10        | -6.427388 | 0.003579 | down       |
| GPD2         | 5.043758 | 0.011652 | up         | GTPBP1       | -6.423734 | 0.004269 | down       |
| MED22        | 5.043758 | 0.011652 | up         | CFB          | -6.379163 | 0.004501 | down       |

|              |          |          |    |              |           |          |      |
|--------------|----------|----------|----|--------------|-----------|----------|------|
| EYA3         | 5.040548 | 0.020297 | up | SLC6A4       | -6.349424 | 0.005716 | down |
| EXOC3L4      | 5.040548 | 0.020297 | up | SPACA9       | -6.347493 | 0.003027 | down |
| BHLHE23      | 5.040548 | 0.020297 | up | KLK12        | -6.318277 | 0.005765 | down |
| GRIA4        | 5.040548 | 0.020297 | up | ACTB         | -6.303976 | 0.004408 | down |
| PLCH1        | 5.040548 | 0.020297 | up | IRF1         | -6.291878 | 0.005966 | down |
| ADAMTS1      | 5.040548 | 0.020297 | up | RPF1         | -6.285061 | 0.003283 | down |
| NDUFC1       | 5.040548 | 0.020297 | up | LYN          | -6.272323 | 0.004847 | down |
| MAFG         | 5.040548 | 0.020297 | up | LOC112441554 | -6.267936 | 0.005024 | down |
| PALD1        | 5.040548 | 0.020297 | up | ALKBH2       | -6.264833 | 0.007034 | down |
| C25H16orf92  | 5.040548 | 0.020297 | up | LOC784768    | -6.258719 | 0.007146 | down |
| LOC507428    | 5.040548 | 0.020297 | up | CIB1         | -6.258094 | 0.005356 | down |
| SERINC2      | 5.040548 | 0.020297 | up | HBQ1         | -6.252126 | 0.007269 | down |
| C26H6orf52   | 5.040548 | 0.020297 | up | LOC112442049 | -6.247596 | 0.007308 | down |
| RPGR         | 5.040548 | 0.020297 | up | MANSC4       | -6.242847 | 0.004919 | down |
| ATG4C        | 5.040548 | 0.020297 | up | GORASP1      | -6.224529 | 0.005064 | down |
| DDX41        | 5.040548 | 0.020297 | up | AAGAB        | -6.215815 | 0.005474 | down |
| LOC617406    | 5.040548 | 0.020297 | up | DSG4         | -6.197694 | 0.007977 | down |
| CIDEA        | 5.040548 | 0.020297 | up | KRT5         | -6.192795 | 0.007504 | down |
| DEDD2        | 5.040548 | 0.020297 | up | CACNB3       | -6.19235  | 0.008328 | down |
| PLA2G4E      | 5.040548 | 0.020297 | up | COL18A1      | -6.173006 | 0.006727 | down |
| DCP1A        | 5.040548 | 0.020297 | up | CCDC73       | -6.166853 | 0.004907 | down |
| ERO1A        | 5.021293 | 0.002801 | up | LYL1         | -6.146915 | 0.007865 | down |
| ATRX         | 5.014538 | 0.020757 | up | PRPF40A      | -6.141438 | 0.008274 | down |
| LOC112442307 | 4.997972 | 0.010355 | up | ALOX12E      | -6.135273 | 0.009497 | down |
| WDR4         | 4.997764 | 0.010512 | up | LHFPL2       | -6.128203 | 0.009641 | down |
| NR1D2        | 4.995067 | 0.002729 | up | TBATA        | -6.125312 | 0.008589 | down |
| CYP19A1      | 4.988299 | 0.021228 | up | TRAPPC13     | -6.116893 | 0.008955 | down |
| ARSI         | 4.988299 | 0.021228 | up | JMJD4        | -6.109483 | 0.010034 | down |
| PRKDC        | 4.988299 | 0.021228 | up | ARL13A       | -6.107036 | 0.009785 | down |
| MDFI         | 4.988299 | 0.021228 | up | AHNAK2       | -6.095125 | 0.006299 | down |
| DCST1        | 4.988299 | 0.021228 | up | CUL9         | -6.080343 | 0.010074 | down |
| LOC788915    | 4.988299 | 0.021228 | up | DNAJC16      | -6.066563 | 0.009088 | down |
| C25H16orf91  | 4.988299 | 0.021228 | up | HPCA         | -6.066384 | 0.008332 | down |
| MTMR12       | 4.988299 | 0.021228 | up | NR2C2        | -6.045211 | 0.011165 | down |
| POLR1B       | 4.988299 | 0.021228 | up | FXR1         | -6.024283 | 0.01013  | down |
| BROX         | 4.988299 | 0.021228 | up | CLTA         | -6.019532 | 0.008371 | down |
| MPDU1        | 4.988299 | 0.021228 | up | TANC1        | -6.019119 | 0.012149 | down |
| SNX31        | 4.988299 | 0.021228 | up | B4GALNT4     | -6.010008 | 0.012421 | down |
| PRR15        | 4.988299 | 0.021228 | up | PHB2         | -5.997116 | 0.009923 | down |
| CCDC68       | 4.988299 | 0.021228 | up | LOC107132949 | -5.996143 | 0.011346 | down |
| SKA2         | 4.988299 | 0.021228 | up | PAN2         | -5.99249  | 0.012472 | down |
| EVA1A        | 4.988299 | 0.021228 | up | CDC42SE2     | -5.991656 | 0.011336 | down |
| ERCC4        | 4.988299 | 0.021228 | up | ARSE         | -5.991388 | 0.011101 | down |
| H2AFV        | 4.988299 | 0.021228 | up | TFR2         | -5.984653 | 0.011298 | down |
| ZNF432       | 4.988299 | 0.021228 | up | TSR1         | -5.983147 | 0.01236  | down |
| MBNL3        | 4.988299 | 0.021228 | up | VPS9D1       | -5.975132 | 0.009221 | down |
| ZC3H6        | 4.988299 | 0.021228 | up | EEF1AKMT1    | -5.966009 | 0.010989 | down |
| NTRK3        | 4.871423 | 4.69E-16 | up | NOTCH4       | -5.963977 | 0.013198 | down |
| SLC38A10     | 4.862384 | 0.003093 | up | GNPDA1       | -5.961314 | 0.01372  | down |
| SMAD4        | 4.855829 | 4.01E-08 | up | NT5C3A       | -5.953043 | 0.009701 | down |
| NOTCH2       | 4.841615 | 0.003374 | up | RAB3GAP2     | -5.945011 | 0.01326  | down |
| ODF3         | 4.801236 | 0.00462  | up | HEATR4       | -5.941809 | 0.013024 | down |
| C18H19orf47  | 4.801102 | 0.027541 | up | LOC100336564 | -5.940013 | 0.012741 | down |
| PDP1         | 4.801102 | 0.027541 | up | SPAM1        | -5.939316 | 0.013884 | down |
| FIBP         | 4.801102 | 0.027541 | up | RCN3         | -5.937783 | 0.009954 | down |
| UPF3B        | 4.801102 | 0.027541 | up | SLC44A3      | -5.937316 | 0.011825 | down |
| ECI1         | 4.7813   | 0.013269 | up | RSPH9        | -5.93424  | 0.012935 | down |
| IL17RE       | 4.749079 | 0.028739 | up | LNX1         | -5.933697 | 0.010269 | down |

|              |          |          |    |              |           |          |      |
|--------------|----------|----------|----|--------------|-----------|----------|------|
| ROS1         | 4.733659 | 0.028159 | up | LOC505972    | -5.928049 | 0.014726 | down |
| NARS         | 4.733659 | 0.029113 | up | SMIM35       | -5.928049 | 0.014726 | down |
| TEAD4        | 4.733659 | 0.029113 | up | FADS2        | -5.927477 | 0.011738 | down |
| NUP54        | 4.696377 | 0.029985 | up | WNT2B        | -5.927289 | 0.014782 | down |
| MGA          | 4.694352 | 0.01947  | up | SSR3         | -5.914028 | 0.015211 | down |
| CHEK2        | 4.680738 | 0.029377 | up | ZNF274       | -5.899382 | 0.015051 | down |
| PRR13        | 4.680738 | 0.030374 | up | FZD5         | -5.892491 | 0.015284 | down |
| LOC789503    | 4.679978 | 0.019568 | up | TRMO         | -5.883148 | 0.012388 | down |
| PDGFA        | 4.665029 | 0.030768 | up | CDC25B       | -5.870054 | 0.015891 | down |
| AGO3         | 4.665029 | 0.030768 | up | ATG16L2      | -5.869218 | 0.014334 | down |
| SLC29A1      | 4.665029 | 0.030768 | up | HTR7         | -5.853145 | 0.014323 | down |
| NFE2         | 4.665029 | 0.029754 | up | RNF214       | -5.85022  | 0.014491 | down |
| ABLIM1       | 4.665029 | 0.030768 | up | BHMG1        | -5.848168 | 0.016156 | down |
| CPLANE2      | 4.665029 | 0.029754 | up | SEN8         | -5.839481 | 0.014707 | down |
| ACSS2        | 4.643042 | 0.031279 | up | ZNF583       | -5.834826 | 0.01447  | down |
| LOC100139549 | 4.643042 | 0.030179 | up | TULP1        | -5.831711 | 0.015346 | down |
| PCGF3        | 4.643042 | 0.031279 | up | YBX3         | -5.824521 | 0.015496 | down |
| ADIPOR2      | 4.643042 | 0.031279 | up | ZCCHC14      | -5.809837 | 0.018031 | down |
| IMPA2        | 4.643042 | 0.031279 | up | LOC101906178 | -5.808713 | 0.016903 | down |
| PPP1R1B      | 4.639272 | 0.008754 | up | DPYSL3       | -5.808312 | 0.016124 | down |
| PCYT1B       | 4.602276 | 0.021563 | up | CDK13        | -5.802076 | 0.015168 | down |
| MXD1         | 4.602252 | 0.021595 | up | VILL         | -5.800472 | 0.019471 | down |
| STRN         | 4.595311 | 0.032506 | up | NDUFB9       | -5.798769 | 0.017241 | down |
| SPAG5        | 4.595311 | 0.032506 | up | MXRA8        | -5.798619 | 0.019494 | down |
| CLUH         | 4.595311 | 0.032506 | up | PRKAA1       | -5.798486 | 0.019552 | down |
| IARS         | 4.595311 | 0.031454 | up | MASP1        | -5.789587 | 0.019852 | down |
| ZGLP1        | 4.595311 | 0.032506 | up | AK5          | -5.777021 | 0.020405 | down |
| PSMD14       | 4.595311 | 0.032506 | up | SYNPO2L      | -5.775956 | 0.014004 | down |
| PHF5A        | 4.520383 | 0.013921 | up | LAMA5        | -5.775225 | 0.016526 | down |
| LOC100336029 | 4.451131 | 0.000192 | up | GCHFR        | -5.76975  | 0.017295 | down |
| BCAM         | 4.413266 | 9.68E-05 | up | SERPINE3     | -5.768709 | 0.017275 | down |
| SH3YL1       | 4.394295 | 0.014027 | up | CDH23        | -5.765799 | 0.012067 | down |
| NRAS         | 4.342249 | 0.000279 | up | ZBTB32       | -5.764706 | 0.016532 | down |
| NECTIN4      | 4.330383 | 0.005454 | up | BAG2         | -5.756848 | 0.020233 | down |
| FGFR2        | 4.321818 | 0.001282 | up | HACD3        | -5.750181 | 0.019492 | down |
| LARS2        | 4.316499 | 0.019671 | up | MCOLN1       | -5.739154 | 0.022031 | down |
| MET          | 4.307432 | 0.000929 | up | YARS         | -5.732711 | 0.022309 | down |
| HIST2H2BE    | 4.225383 | 0.047719 | up | PC           | -5.722043 | 0.016874 | down |
| MRPL45       | 4.225383 | 0.047944 | up | LOC100848495 | -5.718523 | 0.013643 | down |
| ATF6         | 4.225383 | 0.047951 | up | TUBG1        | -5.713824 | 0.019456 | down |
| CYR61        | 4.225383 | 0.047839 | up | CLCA3        | -5.704737 | 0.023535 | down |
| EPPK1        | 4.225383 | 0.047959 | up | ANGPTL8      | -5.695223 | 0.02182  | down |
| FOS          | 4.225383 | 0.047959 | up | PTPDC1       | -5.685707 | 0.022042 | down |
| GGCX         | 4.225383 | 0.047959 | up | MARCKSL1     | -5.67929  | 0.01604  | down |
| GPBAR1       | 4.202645 | 0.02939  | up | DLGAP5       | -5.676746 | 0.024937 | down |
| EPB41L5      | 4.162835 | 0.031193 | up | NLRP5        | -5.67369  | 0.023824 | down |
| ETS1         | 4.159467 | 0.004912 | up | CASKIN1      | -5.665441 | 0.025473 | down |
| CD19         | 4.158691 | 0.031325 | up | HECTD1       | -5.659437 | 0.019255 | down |
| KCNH4        | 4.158691 | 0.031325 | up | KIF20A       | -5.655568 | 0.020775 | down |
| CHD9         | 4.133166 | 0.022894 | up | CHD3         | -5.651269 | 0.022795 | down |
| BRD7         | 4.121094 | 0.020451 | up | GNB4         | -5.649708 | 0.026163 | down |
| RND3         | 4.096813 | 0.032386 | up | CCDC38       | -5.646746 | 0.0221   | down |
| APMAP        | 4.096637 | 0.032826 | up | SNED1        | -5.637508 | 0.021388 | down |
| COMMD3       | 4.095045 | 0.037185 | up | DIAPH1       | -5.636093 | 0.02441  | down |
| OAZ1         | 4.091027 | 0.024603 | up | FAR2         | -5.63459  | 0.024469 | down |
| MARCH6       | 4.077598 | 0.015081 | up | CIT          | -5.630041 | 0.027213 | down |
| LOXL2        | 4.077314 | 0.038069 | up | ERMAP        | -5.616943 | 0.020201 | down |
| RYBP         | 4.059206 | 0.039334 | up | GPR151       | -5.61065  | 0.021871 | down |

|              |          |          |    |              |           |          |      |
|--------------|----------|----------|----|--------------|-----------|----------|------|
| RDH11        | 4.059007 | 0.039636 | up | PAPOLG       | -5.602946 | 0.027257 | down |
| CPEB3        | 4.057125 | 0.042686 | up | ADAM1A       | -5.600825 | 0.028867 | down |
| PFDN1        | 4.056953 | 0.042984 | up | PPOX         | -5.596715 | 0.026257 | down |
| ARHGAP5      | 4.03015  | 0.007765 | up | UBE2R2       | -5.594552 | 0.023939 | down |
| MXRA7        | 4.018104 | 0.045728 | up | PLXNC1       | -5.585956 | 0.017729 | down |
| WFDC13       | 4.018104 | 0.045728 | up | MRPL9        | -5.585006 | 0.026621 | down |
| EBF3         | 4.018104 | 0.045728 | up | TSTA3        | -5.583518 | 0.022298 | down |
| TRIB2        | 4.018104 | 0.045728 | up | C8H9orf84    | -5.582808 | 0.023333 | down |
| APC          | 3.99119  | 2.08E-10 | up | FTSJ3        | -5.579502 | 0.02504  | down |
| PEX12        | 3.984394 | 0.047322 | up | LOC112444151 | -5.574454 | 0.024829 | down |
| RIPOR1       | 3.955977 | 0.048719 | up | LOC104968627 | -5.563639 | 0.024584 | down |
| PTCH1        | 3.939518 | 1.57E-05 | up | COMMD6       | -5.556483 | 0.023486 | down |
| PUS7L        | 3.934211 | 0.002064 | up | EEF2         | -5.556219 | 0.022807 | down |
| PTEN         | 3.895454 | 5.64E-14 | up | TRIM59       | -5.551647 | 0.029775 | down |
| RALY         | 3.869349 | 0.026066 | up | PRAM1        | -5.549768 | 0.027151 | down |
| TFRC         | 3.853567 | 0.04797  | up | E2F5         | -5.54909  | 0.024328 | down |
| RAPGEF1      | 3.826638 | 0.044366 | up | XPA          | -5.547582 | 0.027584 | down |
| SERTAD2      | 3.805727 | 0.007758 | up | SLC16A13     | -5.546806 | 0.027685 | down |
| EGLN3        | 3.782932 | 0.041294 | up | AIFM2        | -5.546015 | 0.024772 | down |
| KRAS         | 3.76302  | 4.47E-10 | up | SLC12A4      | -5.543364 | 0.021791 | down |
| SWAP70       | 3.762296 | 0.036958 | up | PVR          | -5.542591 | 0.029019 | down |
| NKTR         | 3.738323 | 0.035218 | up | TRAF4        | -5.538316 | 0.032463 | down |
| DDR2         | 3.690184 | 0.003958 | up | PRPF40B      | -5.53315  | 0.029221 | down |
| FNBP1        | 3.653429 | 0.022984 | up | SBNO2        | -5.531701 | 0.024457 | down |
| OPN1SW       | 3.648783 | 0.040389 | up | ANGPT2       | -5.530223 | 0.032728 | down |
| MAP3K13      | 3.644869 | 0.02015  | up | CCDC59       | -5.527031 | 0.031267 | down |
| PFKFB2       | 3.589209 | 0.002676 | up | SRRM2        | -5.523751 | 0.022016 | down |
| PIK3CA       | 3.57095  | 1.1E-13  | up | RPL3         | -5.522189 | 0.023976 | down |
| HSPA5        | 3.538431 | 0.005175 | up | LOC522763    | -5.514508 | 0.016561 | down |
| AHCYL1       | 3.514501 | 0.034092 | up | TMEM120B     | -5.513575 | 0.032077 | down |
| EWSR1        | 3.420888 | 1.73E-08 | up | DIXDC1       | -5.510637 | 0.034016 | down |
| AKAP13       | 3.406917 | 0.038143 | up | LOC789031    | -5.509752 | 0.033972 | down |
| ANLN         | 3.360978 | 0.001324 | up | VTI1B        | -5.503085 | 0.017219 | down |
| NSMCE2       | 3.33523  | 0.033101 | up | DONSON       | -5.501007 | 0.03287  | down |
| LOC516742    | 3.312287 | 0.049825 | up | LOC112448260 | -5.498524 | 0.029852 | down |
| KDM4C        | 3.309631 | 0.006442 | up | GDA          | -5.493571 | 0.034903 | down |
| TPBG         | 3.294017 | 0.046464 | up | ARHGEF4      | -5.493212 | 0.028063 | down |
| ERBB4        | 3.247014 | 0.037866 | up | SDR39U1      | -5.492553 | 0.019491 | down |
| RABEPK       | 3.217568 | 0.044108 | up | RIPOR3       | -5.491568 | 0.035117 | down |
| VDAC2        | 3.200758 | 0.022815 | up | CAMK1G       | -5.482251 | 0.035662 | down |
| LOC100847700 | 3.179099 | 0.033857 | up | KIAA1958     | -5.480269 | 0.035775 | down |
| AJUBA        | 3.124397 | 0.042397 | up | LDHC         | -5.476554 | 0.028706 | down |
| LOC520626    | 3.077536 | 0.018615 | up | NMT2         | -5.473809 | 0.036158 | down |
| LOC614376    | 3.020755 | 1.33E-06 | up | TWIST2       | -5.472719 | 0.027316 | down |
| HIF1A        | 2.987986 | 8.78E-06 | up | DNAJB1       | -5.467394 | 0.021282 | down |
| NIPSNAP3A    | 2.969852 | 0.00658  | up | TRIM27       | -5.465046 | 0.031663 | down |
| ANTXR2       | 2.951021 | 0.037858 | up | PHLDA1       | -5.464305 | 0.026335 | down |
| VAR5         | 2.923989 | 0.033431 | up | EPHX1        | -5.464178 | 0.025299 | down |
| MTMR4        | 2.9104   | 0.039004 | up | HDGF         | -5.462854 | 0.031933 | down |
| BMPR1A       | 2.905518 | 0.042063 | up | ATP5F1C      | -5.461869 | 0.035133 | down |
| SMAD7        | 2.879724 | 0.049335 | up | POLR1C       | -5.460754 | 0.033453 | down |
| HSPA1A       | 2.862707 | 4.9E-05  | up | NACC1        | -5.457044 | 0.035523 | down |
| THOC6        | 2.800523 | 0.02494  | up | LOC525426    | -5.454272 | 0.03389  | down |
| PDLIM5       | 2.774213 | 0.0084   | up | PTRH2        | -5.45219  | 0.037566 | down |
| BRAF         | 2.761462 | 1.92E-06 | up | ASPN         | -5.447869 | 0.035869 | down |
| ZSWIM4       | 2.667581 | 0.005273 | up | FSCN1        | -5.442221 | 0.032959 | down |
| SEPT1        | 2.661467 | 0.046151 | up | RPS24        | -5.441692 | 0.027748 | down |
| EFCAB9       | 2.639314 | 0.008034 | up | IL33         | -5.440312 | 0.034804 | down |

|              |          |          |    |              |           |          |      |
|--------------|----------|----------|----|--------------|-----------|----------|------|
| CDK4         | 2.546783 | 0.005473 | up | HHLA2        | -5.438637 | 0.034713 | down |
| TAF6L        | 2.508712 | 0.004843 | up | EHF          | -5.435032 | 0.036945 | down |
| ERN2         | 2.474471 | 0.027779 | up | UBP1         | -5.432421 | 0.033704 | down |
| UBXN1        | 2.368855 | 0.047542 | up | B3GAT2       | -5.431049 | 0.024265 | down |
| TOR1AIP2     | 2.286356 | 0.008536 | up | OGFOD1       | -5.422408 | 0.037407 | down |
| ST3GAL1      | 2.231874 | 0.014371 | up | SYT5         | -5.421992 | 0.030602 | down |
| LOC529277    | 2.224482 | 0.026485 | up | AUNIP        | -5.418577 | 0.039778 | down |
| ABCF1        | 2.192168 | 0.038941 | up | ENO4         | -5.416565 | 0.039781 | down |
| ACTRT3       | 2.189265 | 0.043764 | up | EXOSC3       | -5.413882 | 0.032824 | down |
| TOR1AIP1     | 2.170938 | 0.033461 | up | WDR19        | -5.410079 | 0.040315 | down |
| PLCXD2       | 2.055349 | 0.009469 | up | RCBTB1       | -5.399182 | 0.039104 | down |
| CCND1        | 1.987403 | 0.032328 | up | KLF17        | -5.39371  | 0.039252 | down |
| TAF9B        | 1.915799 | 4.98E-05 | up | COPG2        | -5.393564 | 9.99E-12 | down |
| SERPINE1     | 1.895457 | 0.01561  | up | WDR93        | -5.389971 | 0.041617 | down |
| PPP1R11      | 1.889464 | 0.025211 | up | DNAJC17      | -5.389391 | 0.04153  | down |
| SPP1         | 1.888299 | 1.16E-06 | up | MCCD1        | -5.389259 | 0.039641 | down |
| TMSB10       | 1.28622  | 0.016707 | up | AOX2         | -5.386805 | 0.041951 | down |
| STAG3        | 1.226201 | 0.00502  | up | COL7A1       | -5.386696 | 0.023603 | down |
| LOC112445011 | 1.074134 | 1.05E-05 | up | ADCY7        | -5.380803 | 0.039943 | down |
| LOC101904601 | 1.051453 | 0.025978 | up | TMEM80       | -5.380024 | 0.034052 | down |
|              |          |          |    | EPGN         | -5.377571 | 0.035492 | down |
|              |          |          |    | MPPE1        | -5.370856 | 0.03917  | down |
|              |          |          |    | LOC616819    | -5.361954 | 0.028416 | down |
|              |          |          |    | SMC4         | -5.360249 | 0.041798 | down |
|              |          |          |    | CRIM1        | -5.354811 | 0.04393  | down |
|              |          |          |    | CASZ1        | -5.351544 | 0.044285 | down |
|              |          |          |    | ITGB3BP      | -5.345507 | 0.044691 | down |
|              |          |          |    | CYB5R2       | -5.341626 | 0.044957 | down |
|              |          |          |    | SCYL3        | -5.339196 | 0.031121 | down |
|              |          |          |    | ACIN1        | -5.338826 | 0.034078 | down |
|              |          |          |    | ADAM1B       | -5.337836 | 0.045078 | down |
|              |          |          |    | LOC518106    | -5.333406 | 0.045668 | down |
|              |          |          |    | TAGLN2       | -5.331452 | 0.03059  | down |
|              |          |          |    | ATP1B1       | -5.330717 | 0.045566 | down |
|              |          |          |    | ANKRD53      | -5.329784 | 0.04156  | down |
|              |          |          |    | MMP13        | -5.329678 | 0.021342 | down |
|              |          |          |    | NANOS1       | -5.328068 | 0.045887 | down |
|              |          |          |    | DUSP16       | -5.32474  | 0.046262 | down |
|              |          |          |    | FBXW4        | -5.323181 | 0.044234 | down |
|              |          |          |    | UGP2         | -5.313312 | 0.044624 | down |
|              |          |          |    | SETD6        | -5.311114 | 0.041013 | down |
|              |          |          |    | NCAPD2       | -5.310313 | 0.026823 | down |
|              |          |          |    | LOC112441471 | -5.306449 | 0.0474   | down |
|              |          |          |    | TRIP12       | -5.306343 | 0.047558 | down |
|              |          |          |    | NECAP2       | -5.303407 | 0.047764 | down |
|              |          |          |    | CSTB         | -5.303091 | 0.034604 | down |
|              |          |          |    | DSG3         | -5.302789 | 0.045251 | down |
|              |          |          |    | TNFSF14      | -5.301964 | 0.045656 | down |
|              |          |          |    | LIG3         | -5.30154  | 0.045835 | down |
|              |          |          |    | MFSD4A       | -5.295194 | 0.045769 | down |
|              |          |          |    | TMEM243      | -5.294095 | 0.037638 | down |
|              |          |          |    | SRPRA        | -5.293154 | 0.048494 | down |
|              |          |          |    | MAPKAPK5     | -5.29168  | 0.046129 | down |
|              |          |          |    | AFF1         | -5.286529 | 0.042497 | down |
|              |          |          |    | DAZAP2       | -5.285536 | 0.039314 | down |
|              |          |          |    | PRR15L       | -5.284452 | 0.044756 | down |
|              |          |          |    | ASAP1        | -5.283859 | 4.13E-07 | down |
|              |          |          |    | FTL          | -5.280306 | 0.042596 | down |

|  |  |  |  |              |           |          |      |
|--|--|--|--|--------------|-----------|----------|------|
|  |  |  |  | SPG11        | -5.278522 | 0.03216  | down |
|  |  |  |  | GPM6B        | -5.278422 | 0.04956  | down |
|  |  |  |  | ITPR3        | -5.275609 | 0.047248 | down |
|  |  |  |  | SLC35G2      | -5.271904 | 0.047741 | down |
|  |  |  |  | KLHL36       | -5.270468 | 0.047832 | down |
|  |  |  |  | STX19        | -5.262761 | 0.033934 | down |
|  |  |  |  | SMPDL3B      | -5.259235 | 0.036877 | down |
|  |  |  |  | ANKRD33B     | -5.254511 | 0.031795 | down |
|  |  |  |  | NT5E         | -5.252837 | 0.04899  | down |
|  |  |  |  | TMUB2        | -5.245016 | 0.0408   | down |
|  |  |  |  | ASH1L        | -5.241972 | 0.047854 | down |
|  |  |  |  | GOLGA2       | -5.232368 | 0.037324 | down |
|  |  |  |  | FBXO17       | -5.229025 | 0.048886 | down |
|  |  |  |  | F3           | -5.226483 | 0.041575 | down |
|  |  |  |  | CTNND1       | -5.198415 | 0.043603 | down |
|  |  |  |  | ISYNA1       | -5.189294 | 0.047631 | down |
|  |  |  |  | MIS18BP1     | -5.16228  | 0.049518 | down |
|  |  |  |  | BRI3         | -5.160254 | 0.039596 | down |
|  |  |  |  | TMEM200B     | -5.159388 | 4.23E-07 | down |
|  |  |  |  | TSC22D1      | -5.129515 | 0.039471 | down |
|  |  |  |  | TNFRSF6B     | -5.122925 | 0.048857 | down |
|  |  |  |  | RPL13        | -5.108571 | 0.043749 | down |
|  |  |  |  | PLEKHG3      | -5.1082   | 0.045854 | down |
|  |  |  |  | TRMT112      | -5.101255 | 0.049973 | down |
|  |  |  |  | ABRAXAS1     | -5.097186 | 0.044833 | down |
|  |  |  |  | SLC50A1      | -5.090369 | 0.049109 | down |
|  |  |  |  | MAPK8IP1     | -5.037099 | 0.048966 | down |
|  |  |  |  | GLDC         | -4.828479 | 8.26E-08 | down |
|  |  |  |  | LOC101908039 | -4.810298 | 6.7E-08  | down |
|  |  |  |  | PPP2R1B      | -4.71382  | 2.47E-10 | down |
|  |  |  |  | ARMC10       | -4.449183 | 0.000148 | down |
|  |  |  |  | PKD1L2       | -4.432874 | 2.89E-06 | down |
|  |  |  |  | CCNE2        | -4.334496 | 0.000406 | down |
|  |  |  |  | SDCCAG8      | -4.329093 | 3.47E-06 | down |
|  |  |  |  | MLLT11       | -4.300492 | 0.000642 | down |
|  |  |  |  | PDE8B        | -4.254643 | 0.000654 | down |
|  |  |  |  | SCYL1        | -4.253178 | 4.74E-06 | down |
|  |  |  |  | EIF3B        | -4.216985 | 0.000457 | down |
|  |  |  |  | CCDC66       | -4.199432 | 2.79E-08 | down |
|  |  |  |  | FANCL        | -4.018752 | 4.39E-05 | down |
|  |  |  |  | C2H2orf88    | -3.871844 | 8.51E-05 | down |
|  |  |  |  | ACOT8        | -3.851475 | 0.003915 | down |
|  |  |  |  | ZAR1L        | -3.798677 | 0.00036  | down |
|  |  |  |  | HOXA10       | -3.787842 | 0.005559 | down |
|  |  |  |  | YEATS2       | -3.787444 | 0.006704 | down |
|  |  |  |  | PPEF2        | -3.778651 | 0.000142 | down |
|  |  |  |  | APBA3        | -3.767055 | 0.003096 | down |
|  |  |  |  | RASGRP1      | -3.753849 | 0.007391 | down |
|  |  |  |  | RBM4B        | -3.75252  | 0.000266 | down |
|  |  |  |  | PLCL2        | -3.725879 | 0.000306 | down |
|  |  |  |  | CLIC3        | -3.711025 | 5.84E-06 | down |
|  |  |  |  | C7H19orf44   | -3.700024 | 0.000391 | down |
|  |  |  |  | ZBTB37       | -3.693594 | 0.000561 | down |
|  |  |  |  | REC114       | -3.65419  | 0.006827 | down |
|  |  |  |  | SMPD3        | -3.626839 | 0.009822 | down |
|  |  |  |  | CD160        | -3.623793 | 0.010466 | down |
|  |  |  |  | TMEM140      | -3.616055 | 0.008454 | down |
|  |  |  |  | ADGRF2       | -3.53764  | 0.012825 | down |

|  |  |  |  |              |           |          |      |
|--|--|--|--|--------------|-----------|----------|------|
|  |  |  |  | NSG1         | -3.527522 | 0.000593 | down |
|  |  |  |  | ADAL         | -3.525676 | 0.001191 | down |
|  |  |  |  | EMG1         | -3.511732 | 0.01015  | down |
|  |  |  |  | LOC532875    | -3.50534  | 7.39E-06 | down |
|  |  |  |  | STK32A       | -3.504329 | 0.014856 | down |
|  |  |  |  | AIF1         | -3.500181 | 0.011815 | down |
|  |  |  |  | BBIP1        | -3.49996  | 1.25E-06 | down |
|  |  |  |  | KLK11        | -3.497294 | 0.001849 | down |
|  |  |  |  | NIT1         | -3.465559 | 0.013608 | down |
|  |  |  |  | TOPORS       | -3.4547   | 0.010231 | down |
|  |  |  |  | C15H11orf49  | -3.452809 | 0.015717 | down |
|  |  |  |  | TRIM13       | -3.431502 | 0.000424 | down |
|  |  |  |  | SLK          | -3.427056 | 0.013133 | down |
|  |  |  |  | DNAJC24      | -3.415661 | 3.03E-09 | down |
|  |  |  |  | NEPRO        | -3.408989 | 0.000286 | down |
|  |  |  |  | LOC112442013 | -3.408796 | 0.020468 | down |
|  |  |  |  | YIF1B        | -3.39513  | 0.000222 | down |
|  |  |  |  | DNASE1       | -3.386731 | 0.018037 | down |
|  |  |  |  | DDB2         | -3.372103 | 1.15E-06 | down |
|  |  |  |  | CACNB2       | -3.369884 | 0.02008  | down |
|  |  |  |  | MAGI3        | -3.35978  | 0.00046  | down |
|  |  |  |  | NUP88        | -3.346504 | 0.018247 | down |
|  |  |  |  | TCP1         | -3.33055  | 4.65E-07 | down |
|  |  |  |  | BUD31        | -3.314974 | 0.023241 | down |
|  |  |  |  | CDK17        | -3.30666  | 0.018376 | down |
|  |  |  |  | PPHLN1       | -3.292927 | 0.022798 | down |
|  |  |  |  | ABCA7        | -3.29024  | 0.024675 | down |
|  |  |  |  | PDZD2        | -3.288496 | 0.018    | down |
|  |  |  |  | SLC41A3      | -3.284577 | 0.024396 | down |
|  |  |  |  | AKAP5        | -3.27064  | 0.002678 | down |
|  |  |  |  | ACTA2        | -3.253269 | 0.002114 | down |
|  |  |  |  | DDX49        | -3.248155 | 0.020011 | down |
|  |  |  |  | IFITM5       | -3.228552 | 0.029282 | down |
|  |  |  |  | HEXIM1       | -3.21646  | 0.032186 | down |
|  |  |  |  | LOC100847454 | -3.207403 | 1.12E-05 | down |
|  |  |  |  | STRBP        | -3.196971 | 1.67E-06 | down |
|  |  |  |  | DCUN1D3      | -3.193261 | 0.032234 | down |
|  |  |  |  | C5H12orf56   | -3.191997 | 0.032359 | down |
|  |  |  |  | MYO1H        | -3.191342 | 0.005943 | down |
|  |  |  |  | PIGB         | -3.185363 | 0.004392 | down |
|  |  |  |  | MXI1         | -3.174716 | 0.034451 | down |
|  |  |  |  | GPR183       | -3.167478 | 0.03479  | down |
|  |  |  |  | OR9Q2        | -3.157636 | 0.035937 | down |
|  |  |  |  | LOC112448894 | -3.14536  | 0.028156 | down |
|  |  |  |  | STAT4        | -3.139937 | 0.035486 | down |
|  |  |  |  | LOC107131992 | -3.12593  | 0.035786 | down |
|  |  |  |  | GAS8         | -3.121172 | 0.000672 | down |
|  |  |  |  | NSUN7        | -3.107024 | 0.041361 | down |
|  |  |  |  | CLU          | -3.074323 | 0.043349 | down |
|  |  |  |  | ZNF677       | -3.053609 | 0.006083 | down |
|  |  |  |  | FOXRED2      | -3.043761 | 0.040911 | down |
|  |  |  |  | GPN1         | -3.041142 | 0.048923 | down |
|  |  |  |  | MRPL55       | -3.03585  | 0.038028 | down |
|  |  |  |  | PCNT         | -3.031809 | 0.04848  | down |
|  |  |  |  | EIF2S1       | -3.031098 | 0.011088 | down |
|  |  |  |  | TRIM17       | -3.019139 | 0.045337 | down |
|  |  |  |  | LRRC39       | -3.017463 | 0.005223 | down |
|  |  |  |  | PASK         | -3.014531 | 0.048764 | down |

|  |  |  |  |              |           |          |      |
|--|--|--|--|--------------|-----------|----------|------|
|  |  |  |  | CRB2         | -3.005744 | 0.032618 | down |
|  |  |  |  | GUF1         | -3.00506  | 0.002229 | down |
|  |  |  |  | SMIM33       | -2.973818 | 0.01288  | down |
|  |  |  |  | VGf          | -2.942097 | 0.000659 | down |
|  |  |  |  | ATXN7L3      | -2.915032 | 0.010308 | down |
|  |  |  |  | GNPNAT1      | -2.911963 | 0.001412 | down |
|  |  |  |  | TRNT1        | -2.897265 | 0.013057 | down |
|  |  |  |  | RPE          | -2.894847 | 0.016729 | down |
|  |  |  |  | HGFAC        | -2.894607 | 0.017434 | down |
|  |  |  |  | NSD1         | -2.890195 | 0.048209 | down |
|  |  |  |  | MOG          | -2.887699 | 2.6E-11  | down |
|  |  |  |  | LRRC19       | -2.864338 | 0.009967 | down |
|  |  |  |  | PP2D1        | -2.864222 | 0.000156 | down |
|  |  |  |  | CFAP126      | -2.846078 | 0.049525 | down |
|  |  |  |  | EID1         | -2.836352 | 0.047617 | down |
|  |  |  |  | RNF227       | -2.831081 | 9.95E-06 | down |
|  |  |  |  | GPATCH11     | -2.827985 | 0.004043 | down |
|  |  |  |  | LOC782781    | -2.827407 | 0.019417 | down |
|  |  |  |  | GGACT        | -2.769863 | 0.021094 | down |
|  |  |  |  | LOC104974020 | -2.744888 | 0.022784 | down |
|  |  |  |  | CCDC189      | -2.739341 | 0.000489 | down |
|  |  |  |  | PLTP         | -2.73677  | 0.006883 | down |
|  |  |  |  | POLR2B       | -2.691258 | 0.000161 | down |
|  |  |  |  | CENPBD1      | -2.679383 | 0.001295 | down |
|  |  |  |  | CDKN2B       | -2.676771 | 0.000363 | down |
|  |  |  |  | ZRANB1       | -2.663339 | 0.024708 | down |
|  |  |  |  | PAF1         | -2.658896 | 0.025373 | down |
|  |  |  |  | KRR1         | -2.645538 | 0.033133 | down |
|  |  |  |  | AGBL3        | -2.631356 | 0.008779 | down |
|  |  |  |  | CEACAM1      | -2.620234 | 0.011564 | down |
|  |  |  |  | TUBA1C       | -2.610969 | 6.95E-07 | down |
|  |  |  |  | WDR72        | -2.594474 | 0.003216 | down |
|  |  |  |  | MEGF11       | -2.592279 | 5.89E-05 | down |
|  |  |  |  | SLC16A4      | -2.585895 | 2.32E-06 | down |
|  |  |  |  | TRIM52       | -2.572418 | 0.000199 | down |
|  |  |  |  | SH2B3        | -2.551483 | 0.000153 | down |
|  |  |  |  | KCNRG        | -2.542766 | 0.021005 | down |
|  |  |  |  | AQP11        | -2.540755 | 0.047084 | down |
|  |  |  |  | OMG          | -2.537765 | 2.99E-05 | down |
|  |  |  |  | RAB24        | -2.537446 | 0.007273 | down |
|  |  |  |  | GAPDHS       | -2.531448 | 0.048632 | down |
|  |  |  |  | ABCC3        | -2.530229 | 0.046255 | down |
|  |  |  |  | FER1L5       | -2.51938  | 0.003894 | down |
|  |  |  |  | SLC23A1      | -2.487349 | 0.048262 | down |
|  |  |  |  | KRI1         | -2.484304 | 0.032735 | down |
|  |  |  |  | SPTB         | -2.48392  | 1.39E-07 | down |
|  |  |  |  | CCAR2        | -2.481498 | 0.048047 | down |
|  |  |  |  | MAPK15       | -2.479728 | 0.000833 | down |
|  |  |  |  | CC2D2A       | -2.465854 | 0.039225 | down |
|  |  |  |  | HMGA1        | -2.457727 | 0.043166 | down |
|  |  |  |  | FBXL14       | -2.457259 | 1.21E-07 | down |
|  |  |  |  | NR2C2AP      | -2.444656 | 0.004084 | down |
|  |  |  |  | LY6G6F       | -2.438668 | 2.69E-05 | down |
|  |  |  |  | LOC112448863 | -2.438571 | 0.045391 | down |
|  |  |  |  | AKAP9        | -2.43449  | 0.036544 | down |
|  |  |  |  | BAZ2A        | -2.419758 | 0.022781 | down |
|  |  |  |  | LOC101906018 | -2.409485 | 0.000673 | down |
|  |  |  |  | LOC107132617 | -2.40296  | 0.020939 | down |



|  |  |  |  |              |           |          |      |
|--|--|--|--|--------------|-----------|----------|------|
|  |  |  |  | CD3EAP       | -2.399614 | 0.020369 | down |
|  |  |  |  | TMEM175      | -2.395657 | 0.031096 | down |
|  |  |  |  | PAICS        | -2.356282 | 0.01542  | down |
|  |  |  |  | GREB1L       | -2.347917 | 0.00096  | down |
|  |  |  |  | LARGE2       | -2.340148 | 0.000108 | down |
|  |  |  |  | FANCI        | -2.321105 | 0.01206  | down |
|  |  |  |  | WDR6         | -2.310326 | 0.033931 | down |
|  |  |  |  | ORAOV1       | -2.306729 | 0.011682 | down |
|  |  |  |  | LYPD1        | -2.268171 | 0.002384 | down |
|  |  |  |  | FRY          | -2.266885 | 0.000172 | down |
|  |  |  |  | TTC28        | -2.250212 | 0.002211 | down |
|  |  |  |  | FUZ          | -2.24976  | 0.000269 | down |
|  |  |  |  | ZNHIT3       | -2.246333 | 0.003807 | down |
|  |  |  |  | EVI2A        | -2.244341 | 0.003618 | down |
|  |  |  |  | ZBTB11       | -2.233872 | 0.044514 | down |
|  |  |  |  | C16H1orf112  | -2.220361 | 0.001691 | down |
|  |  |  |  | DENND1C      | -2.20245  | 6.4E-06  | down |
|  |  |  |  | PHYKPL       | -2.193952 | 0.030888 | down |
|  |  |  |  | BMP6         | -2.182163 | 0.011492 | down |
|  |  |  |  | COL17A1      | -2.174146 | 0.039968 | down |
|  |  |  |  | CBARP        | -2.172614 | 0.02709  | down |
|  |  |  |  | PDCD11       | -2.170702 | 0.031571 | down |
|  |  |  |  | FBXL20       | -2.156806 | 4.62E-07 | down |
|  |  |  |  | LOC509034    | -2.155765 | 2.47E-09 | down |
|  |  |  |  | NDUFAF7      | -2.144957 | 0.001003 | down |
|  |  |  |  | MZF1         | -2.143258 | 0.020112 | down |
|  |  |  |  | HERC5        | -2.135917 | 0.017498 | down |
|  |  |  |  | LOC107132994 | -2.135894 | 0.001058 | down |
|  |  |  |  | TMOD1        | -2.130997 | 0.005129 | down |
|  |  |  |  | LOC104975027 | -2.129607 | 0.030803 | down |
|  |  |  |  | FASN         | -2.124688 | 0.039568 | down |
|  |  |  |  | RFXANK       | -2.118634 | 0.03128  | down |
|  |  |  |  | C15H11orf42  | -2.11349  | 0.027941 | down |
|  |  |  |  | TM6SF1       | -2.112373 | 0.001534 | down |
|  |  |  |  | LOC112447324 | -2.110051 | 0.000124 | down |
|  |  |  |  | LENG9        | -2.108549 | 0.001669 | down |
|  |  |  |  | ZAN          | -2.089297 | 0.00921  | down |
|  |  |  |  | MAK16        | -2.087308 | 0.045162 | down |
|  |  |  |  | CSTF3        | -2.072308 | 0.047506 | down |
|  |  |  |  | ZC3H14       | -2.043603 | 0.024208 | down |
|  |  |  |  | CHRNA2       | -2.043159 | 0.005731 | down |
|  |  |  |  | NAPEPLD      | -2.010057 | 3.37E-05 | down |
|  |  |  |  | TIAM2        | -2.000896 | 0.035266 | down |
|  |  |  |  | LOC100848357 | -1.980077 | 0.003826 | down |
|  |  |  |  | SLC3A1       | -1.958985 | 0.03759  | down |
|  |  |  |  | EVI2B        | -1.95116  | 0.001528 | down |
|  |  |  |  | LOC112447762 | -1.950179 | 1.36E-05 | down |
|  |  |  |  | LOC101902106 | -1.946839 | 0.046295 | down |
|  |  |  |  | CCDC84       | -1.939719 | 0.01412  | down |
|  |  |  |  | KDM7A        | -1.931791 | 0.033599 | down |
|  |  |  |  | PRKAR1A      | -1.925284 | 0.049168 | down |
|  |  |  |  | HSPA4L       | -1.921369 | 0.048856 | down |
|  |  |  |  | LOC101905992 | -1.91263  | 0.033136 | down |
|  |  |  |  | LIPM         | -1.906762 | 0.024252 | down |
|  |  |  |  | ERMP1        | -1.86666  | 0.026074 | down |
|  |  |  |  | ZNF729       | -1.862714 | 0.04108  | down |
|  |  |  |  | LTBP3        | -1.856159 | 0.00021  | down |
|  |  |  |  | SLC18A2      | -1.85005  | 0.034981 | down |

|  |  |  |  |              |           |          |      |
|--|--|--|--|--------------|-----------|----------|------|
|  |  |  |  | RAD54L       | -1.844874 | 0.049101 | down |
|  |  |  |  | CSPG4        | -1.840681 | 0.005271 | down |
|  |  |  |  | MRPL47       | -1.839902 | 0.024053 | down |
|  |  |  |  | GFY          | -1.838172 | 0.048088 | down |
|  |  |  |  | ZRANB3       | -1.838054 | 0.044206 | down |
|  |  |  |  | THOC1        | -1.835124 | 8.52E-07 | down |
|  |  |  |  | ONE          | -1.801905 | 0.043125 | down |
|  |  |  |  | ESRP2        | -1.792293 | 0.020666 | down |
|  |  |  |  | VWA2         | -1.789262 | 0.024263 | down |
|  |  |  |  | TMEM216      | -1.787144 | 2.81E-05 | down |
|  |  |  |  | ANKRD42      | -1.783645 | 0.002354 | down |
|  |  |  |  | UPB1         | -1.779742 | 0.012019 | down |
|  |  |  |  | TMCO6        | -1.76382  | 0.00349  | down |
|  |  |  |  | TFIP11       | -1.763074 | 0.039512 | down |
|  |  |  |  | NDUFA6       | -1.745411 | 0.007341 | down |
|  |  |  |  | RPP38        | -1.703362 | 0.012055 | down |
|  |  |  |  | MRNIP        | -1.699397 | 0.007578 | down |
|  |  |  |  | PPWD1        | -1.690602 | 0.04871  | down |
|  |  |  |  | TMEM45B      | -1.67783  | 0.003398 | down |
|  |  |  |  | PRELID3A     | -1.673887 | 0.000269 | down |
|  |  |  |  | NR1I3        | -1.671587 | 0.016803 | down |
|  |  |  |  | VPS54        | -1.667442 | 0.000731 | down |
|  |  |  |  | PIK3CD       | -1.6621   | 9.06E-06 | down |
|  |  |  |  | FAM184B      | -1.652952 | 4.74E-09 | down |
|  |  |  |  | GRTP1        | -1.651903 | 0.000922 | down |
|  |  |  |  | MPHOSPH8     | -1.646847 | 0.023049 | down |
|  |  |  |  | NAT9         | -1.634668 | 0.023107 | down |
|  |  |  |  | DALRD3       | -1.633139 | 0.030015 | down |
|  |  |  |  | LDLRAD2      | -1.631572 | 0.013027 | down |
|  |  |  |  | PKMYT1       | -1.626365 | 0.022275 | down |
|  |  |  |  | KDEL3        | -1.621218 | 0.015741 | down |
|  |  |  |  | RNF113A      | -1.601321 | 0.002354 | down |
|  |  |  |  | LRR4         | -1.58953  | 0.009332 | down |
|  |  |  |  | PHTF1        | -1.585606 | 0.007585 | down |
|  |  |  |  | LOC112445988 | -1.539353 | 0.048441 | down |
|  |  |  |  | YIPF2        | -1.539201 | 0.005617 | down |
|  |  |  |  | CTNS         | -1.525529 | 0.004074 | down |
|  |  |  |  | CD37         | -1.517309 | 0.016211 | down |
|  |  |  |  | KLHL8        | -1.506616 | 6.87E-07 | down |
|  |  |  |  | FAM161B      | -1.504323 | 0.001747 | down |
|  |  |  |  | KCNJ13       | -1.501692 | 0.004248 | down |
|  |  |  |  | DNAH7        | -1.48691  | 0.009177 | down |
|  |  |  |  | LOC100848188 | -1.481323 | 0.008678 | down |
|  |  |  |  | SHLD2        | -1.475261 | 0.001191 | down |
|  |  |  |  | BBOF1        | -1.440987 | 0.021481 | down |
|  |  |  |  | RAD9A        | -1.428973 | 0.003085 | down |
|  |  |  |  | AGBL5        | -1.423842 | 0.003242 | down |
|  |  |  |  | ZFYVE9       | -1.407942 | 0.000185 | down |
|  |  |  |  | LOC112443225 | -1.400785 | 0.001357 | down |
|  |  |  |  | LOC107132958 | -1.383638 | 0.004171 | down |
|  |  |  |  | GPS2         | -1.381872 | 2.44E-05 | down |
|  |  |  |  | GLRX2        | -1.377349 | 0.049593 | down |
|  |  |  |  | ST7L         | -1.372824 | 0.000569 | down |
|  |  |  |  | MTHFD2L      | -1.360401 | 0.040867 | down |
|  |  |  |  | FN1          | -1.350292 | 0.000167 | down |
|  |  |  |  | MAP3K15      | -1.345281 | 0.003433 | down |
|  |  |  |  | RPS6KL1      | -1.320671 | 0.004354 | down |
|  |  |  |  | NDEL1        | -1.288969 | 0.007578 | down |

|  |  |  |  |              |           |          |      |
|--|--|--|--|--------------|-----------|----------|------|
|  |  |  |  | MASP2        | -1.27023  | 0.015536 | down |
|  |  |  |  | ATG7         | -1.261962 | 0.015763 | down |
|  |  |  |  | PLPP1        | -1.242423 | 0.011883 | down |
|  |  |  |  | LOC112448540 | -1.237365 | 0.044528 | down |
|  |  |  |  | MIA3         | -1.226954 | 2.46E-05 | down |
|  |  |  |  | KANSL1L      | -1.207557 | 0.008976 | down |
|  |  |  |  | SURF2        | -1.202532 | 0.001136 | down |
|  |  |  |  | BACE1        | -1.190975 | 0.004687 | down |
|  |  |  |  | SLA2         | -1.15939  | 0.014698 | down |
|  |  |  |  | ABHD12B      | -1.152729 | 0.034079 | down |
|  |  |  |  | JMJD8        | -1.141944 | 0.017318 | down |
|  |  |  |  | DIMT1        | -1.141429 | 0.044346 | down |
|  |  |  |  | MAP6D1       | -1.138598 | 0.013997 | down |
|  |  |  |  | EML6         | -1.117696 | 0.002443 | down |
|  |  |  |  | METTL23      | -1.105629 | 0.008592 | down |
|  |  |  |  | SLC24A5      | -1.094819 | 0.039641 | down |
|  |  |  |  | GNAT2        | -1.091777 | 0.005534 | down |
|  |  |  |  | MCC          | -1.088441 | 0.046625 | down |
|  |  |  |  | SNF8         | -1.082818 | 0.018843 | down |
|  |  |  |  | METTL5       | -1.022838 | 0.042161 | down |
|  |  |  |  | TINF2        | -1.004447 | 0.029016 | down |
|  |  |  |  | NEMP2        | -1.00103  | 0.012814 | down |
