# Supplementary material for: N6‐Methyladenosine Modification Profile in Bovine Mammary Epithelial Cells Treated with Heat‐Inactivated Staphylococcus aureus
Source: Hindawi journal article supplement (doi:10.1155/2022/1704172), 2022-01-01
Supplement: f1 [file 1704172.f1.zip]

**Table S1. Differentially methylated RNA sites for: *S. aureus\_vs\_Con***  
**Fold change cut-off: 2**  
**P-value cut-off: 0.00001**

| GeneName     | txStart   | txEnd     | Chrom          | Peak_length | log2(FoldChange) | lg(P-value)  | Regulation |
|--------------|-----------|-----------|----------------|-------------|------------------|--------------|------------|
| POLA2        | 43504012  | 43504240  | 29             | 228         | 2.544720654      | -5.04412566  | hyper      |
| RYBP         | 29277201  | 29277420  | 22             | 219         | 3.584962501      | -5.213292467 | hyper      |
| FOXD1        | 8183421   | 8183800   | 20             | 379         | 5.935459748      | -5.034591042 | hyper      |
| KDM3A        | 48394594  | 48394800  | 11             | 206         | 1.270224874      | -7.348507483 | hyper      |
| TCTE1        | 17783681  | 17783900  | 23             | 219         | 5.754887502      | -5.473179528 | hyper      |
| PNPLA8       | 49588601  | 49588820  | 4              | 219         | 3.86507042       | -5.067130576 | hyper      |
| LOC788175    | 12133081  | 12133480  | 3              | 399         | 5.744161096      | -5.216175115 | hyper      |
| ALK          | 70660375  | 70661760  | 11             | 1385        | 2.94428644       | -5.096748648 | hyper      |
| LZTS1        | 67371075  | 67371555  | 8              | 480         | 1.212695224      | -6.494254234 | hyper      |
| ERO1A        | 11498514  | 11498840  | 10             | 326         | 2.752990467      | -5.134181229 | hyper      |
| ADM          | 42378001  | 42378320  | 15             | 319         | 5.935459748      | -5.028754579 | hyper      |
| LOC785244    | 36701     | 36920     | NW_020191779.1 | 219         | 2.830941742      | -5.286446323 | hyper      |
| LIX1L        | 21440946  | 21441280  | 3              | 334         | 2.125745553      | -5.009581431 | hyper      |
| GVQW3        | 55823141  | 55823460  | 15             | 319         | 5.916476644      | -5.147675438 | hyper      |
| COPS7B       | 119526921 | 119527280 | 2              | 359         | 2.438039325      | -5.045388592 | hyper      |
| IL31RA       | 23279841  | 23280180  | 20             | 339         | 5.935459748      | -5.028754579 | hyper      |
| DEGS2        | 65093861  | 65094254  | 21             | 393         | 2.569132272      | -5.034065933 | hyper      |
| LOC112443853 | 6727101   | 6727460   | 23             | 359         | 2.919304766      | -5.501066292 | hyper      |
| KLHL6        | 83597549  | 83597780  | 1              | 231         | 5.897240426      | -5.859800787 | hyper      |
| LOC112447503 | 9744081   | 9744336   | 7              | 255         | 5.935459748      | -5.028754579 | hyper      |
| SPECC1       | 33638477  | 33638721  | 19             | 244         | 1.03332342       | -5.857030656 | hyper      |
| LOC781152    | 37821     | 38119     | NW_020191248.1 | 298         | 3.136372442      | -5.100143325 | hyper      |
| LURAP1       | 99869481  | 99869780  | 3              | 299         | 5.532940288      | -5.233182794 | hyper      |
| RBAK         | 38548941  | 38549280  | 25             | 339         | 5.916476644      | -5.147675438 | hyper      |
| CHRM1        | 41232881  | 41233187  | 29             | 306         | 5.935459748      | -5.034591042 | hyper      |
| EFNB2        | 82288801  | 82289093  | 12             | 292         | 2.59285041       | -5.094507393 | hyper      |
| LOC513659    | 53888061  | 53888440  | 3              | 379         | 5.744161096      | -5.216175115 | hyper      |
| CPT1A        | 46169281  | 46169520  | 29             | 239         | 4.778973121      | -5.117135022 | hyper      |
| CFAP69       | 74502810  | 74503100  | 4              | 290         | 4.413157766      | -5.23418826  | hyper      |
| LOC786870    | 47817404  | 47817635  | 15             | 231         | 3.070389328      | -5.001968767 | hyper      |
| FOSB         | 53076964  | 53077285  | 18             | 321         | 5.095829659      | -5.377628932 | hyper      |
| ALDH1B1      | 62434981  | 62435340  | 8              | 359         | 5.744161096      | -5.501700188 | hyper      |
| CASTOR1      | 69305133  | 69305374  | 17             | 241         | 2.52501996       | -5.152415599 | hyper      |
| LOC104968438 | 23103181  | 23103386  | 8              | 205         | 5.935459748      | -5.028754579 | hyper      |
| RHEBL1       | 30752381  | 30752760  | 5              | 379         | 5.741466986      | -5.504099672 | hyper      |
| LOC112445067 | 37915341  | 37915640  | 30             | 299         | 4.6794801        | -5.588430167 | hyper      |
| LOC101903205 | 29789521  | 29789900  | 8              | 379         | 5.916476644      | -5.147675438 | hyper      |
| CAMKK2       | 53888921  | 53889149  | 17             | 228         | 2.494232725      | -5.202553729 | hyper      |
| TMEM138      | 39868421  | 39868800  | 29             | 379         | 3.483517237      | -5.181509011 | hyper      |
| DHX34        | 54342722  | 54343000  | 18             | 278         | 4.653442239      | -5.106502485 | hyper      |
| F2RL2        | 7854380   | 7854604   | 10             | 224         | 2.101235295      | -5.007865992 | hyper      |
| LOC785723    | 27768801  | 27769020  | 10             | 219         | 5.741466986      | -5.504099672 | hyper      |
| BASP1        | 55908759  | 55909060  | 20             | 301         | 2.066342495      | -5.13493048  | hyper      |
| RBFOX3       | 52892528  | 52893000  | 19             | 472         | 2.573674429      | -5.27609034  | hyper      |
| SERPINE1     | 35605621  | 35605860  | 25             | 239         | 4.653442239      | -5.215978191 | hyper      |
| RAB3IP       | 43712841  | 43713120  | 5              | 279         | 3.562242424      | -5.0106999   | hyper      |
| LOC112443853 | 6752921   | 6753260   | 23             | 339         | 5.916476644      | -5.147675438 | hyper      |
| PDGFRA       | 69770501  | 69770720  | 6              | 219         | 4.128104826      | -5.128618679 | hyper      |
| LOC104968434 | 92832861  | 92833200  | 4              | 339         | 3.672425342      | -5.173430332 | hyper      |
| MUC3A        | 35725301  | 35725600  | 25             | 299         | 5.935459748      | -5.034591042 | hyper      |

|              |           |           |                |      |             |              |       |
|--------------|-----------|-----------|----------------|------|-------------|--------------|-------|
| ZNF34        | 308121    | 308480    | 14             | 359  | 3.03433204  | -5.193128073 | hyper |
| LOC789121    | 105600877 | 105601200 | 4              | 323  | 5.935459748 | -5.028754579 | hyper |
| IGFN1        | 79731341  | 79731560  | 16             | 219  | 5.5360529   | -5.236841646 | hyper |
| RAB2B        | 25693006  | 25693300  | 10             | 294  | 1.744236121 | -5.008348045 | hyper |
| BEAN1        | 34232281  | 34232760  | 18             | 479  | 2.18663346  | -5.069465297 | hyper |
| STARD9       | 37997641  | 37998080  | 10             | 439  | 3.39714734  | -5.047630368 | hyper |
| ZBED2        | 56343341  | 56343580  | 1              | 239  | 3.672425342 | -5.164714721 | hyper |
| FGF14        | 78131961  | 78132180  | 12             | 219  | 5.935459748 | -5.028754579 | hyper |
| LOC112441491 | 64657057  | 64657280  | 18             | 223  | 6.106432078 | -5.232980408 | hyper |
| IL-15L       | 49130621  | 49130860  | 18             | 239  | 5.532940288 | -5.233182794 | hyper |
| ZEB2         | 52263120  | 52263380  | 2              | 260  | 5.741466986 | -5.218511649 | hyper |
| CSRNP1       | 12488421  | 12488900  | 22             | 479  | 2.103537604 | -5.060196798 | hyper |
| MGC134232    | 124050801 | 124051180 | 30             | 379  | 5.722466024 | -5.515091496 | hyper |
| C18H19orf81  | 56747061  | 56748820  | 18             | 1759 | 1.093787147 | -6.590297725 | hyper |
| PIGM         | 9647521   | 9647791   | 3              | 270  | 1.259790831 | -5.075133557 | hyper |
| FAM177B      | 26239581  | 26239925  | 16             | 344  | 2.72357943  | -5.045165217 | hyper |
| LOC112446614 | 59005076  | 59005300  | 5              | 224  | 5.752213368 | -5.47416502  | hyper |
| ISCA2        | 85785621  | 85785880  | 10             | 259  | 4.018859027 | -5.290767635 | hyper |
| LOC112443209 | 716321    | 716560    | 21             | 239  | 3.925999419 | -5.13448304  | hyper |
| PALB2        | 21292261  | 21292540  | 25             | 279  | 5.5360529   | -5.236841646 | hyper |
| SH2B2        | 34700155  | 34700425  | 25             | 270  | 1.344495852 | -5.006395764 | hyper |
| CSRNP1       | 12489961  | 12490240  | 22             | 279  | 5.495055528 | -5.169805904 | hyper |
| PDE6C        | 14912461  | 14912820  | 26             | 359  | 5.754887502 | -5.473179528 | hyper |
| PANK1        | 11302181  | 11302737  | 26             | 556  | 1.217190283 | -5.063678996 | hyper |
| CFLAR        | 89725961  | 89726258  | 2              | 297  | 2.883071976 | -5.164338945 | hyper |
| LOC786254    | 106067361 | 106067740 | 4              | 379  | 3.584962501 | -5.014604719 | hyper |
| INTS1        | 41444829  | 41445084  | 25             | 255  | 1.068479738 | -5.429283368 | hyper |
| TTC23        | 7417841   | 7418180   | 21             | 339  | 3.565979397 | -5.197093036 | hyper |
| ELAVL4       | 96071528  | 96071820  | 3              | 292  | 5.916476644 | -5.147675438 | hyper |
| LOC788535    | 59529681  | 59529920  | 5              | 239  | 3.594361199 | -5.165101554 | hyper |
| MAP1B        | 9405421   | 9405642   | 20             | 221  | 3.461133914 | -5.307482581 | hyper |
| PSORS1C2     | 28007101  | 28007618  | 23             | 517  | 2.108040629 | -5.096674371 | hyper |
| KHDRBS3      | 6543508   | 6543760   | 14             | 252  | 3.702798991 | -5.174177158 | hyper |
| DUSP27       | 1607521   | 1607860   | 3              | 339  | 2.456189606 | -5.191290024 | hyper |
| ANGPTL6      | 14658021  | 14658322  | 7              | 301  | 5.935459748 | -5.028754579 | hyper |
| NOL9         | 46834190  | 46834400  | 16             | 210  | 2.819427754 | -5.144205124 | hyper |
| LOC100847679 | 14961     | 15240     | NW_020190791.1 | 279  | 5.935459748 | -5.028754579 | hyper |
| IFI16        | 10746901  | 10747260  | 3              | 359  | 3.633217669 | -5.191608248 | hyper |
| COL11A1      | 40529801  | 40530080  | 3              | 279  | 5.935459748 | -5.028754579 | hyper |
| LOC532479    | 78251901  | 78252260  | 15             | 359  | 5.5360529   | -5.236841646 | hyper |
| CLPTM1L      | 71117510  | 71117880  | 20             | 370  | 2.341766842 | -5.386201766 | hyper |
| HAO2         | 23733641  | 23733960  | 3              | 319  | 2.936005146 | -5.537707785 | hyper |
| IGFBP5       | 104679441 | 104679740 | 2              | 299  | 4.102238194 | -5.25895877  | hyper |
| LOC506121    | 77916561  | 77916898  | 15             | 337  | 3.672425342 | -5.164714721 | hyper |
| F5           | 37185681  | 37186060  | 16             | 379  | 5.935459748 | -5.028754579 | hyper |
| LOC112442402 | 47705461  | 47705900  | 18             | 439  | 4.109121722 | -5.205686668 | hyper |
| FHAD1        | 52086473  | 52086760  | 16             | 287  | 5.935459748 | -5.028754579 | hyper |
| MCOLN2       | 59173601  | 59173980  | 3              | 379  | 5.741466986 | -5.218511649 | hyper |
| CRCT1        | 18184161  | 18184773  | 3              | 612  | 5.741386727 | -5.977107255 | hyper |
| CDH4         | 55180735  | 55180969  | 13             | 234  | 4.295575576 | -6.069287097 | hyper |
| USP26        | 16901441  | 16901740  | 30             | 299  | 3.892923108 | -6.121177228 | hyper |
| NEFH         | 68691661  | 68692040  | 17             | 379  | 3.171666335 | -5.197966222 | hyper |
| NQO2         | 50632041  | 50632639  | 23             | 598  | 1.001658842 | -5.374273218 | hyper |
| NAV3         | 7681281   | 7681780   | 5              | 499  | 1.378511623 | -5.4720769   | hyper |
| LOC101902555 | 516281    | 516660    | NW_020190994.1 | 379  | 4.028951374 | -5.215387871 | hyper |
| CDC6         | 40535001  | 40535309  | 19             | 308  | 3.192400034 | -5.123191925 | hyper |

|              |           |           |    |      |              |              |       |
|--------------|-----------|-----------|----|------|--------------|--------------|-------|
| PHYHIPL      | 14882021  | 14882440  | 28 | 419  | 4.128104826  | -5.135067485 | hyper |
| IL1RL2       | 7057361   | 7057700   | 11 | 339  | 3.502500341  | -5.139343023 | hyper |
| PDCD1        | 120838721 | 120839000 | 3  | 279  | 2.788685711  | -5.142370799 | hyper |
| LOC781261    | 74730061  | 74730340  | 8  | 279  | 5.942514505  | -5.692696738 | hyper |
| ADPRHL1      | 86660787  | 86661020  | 12 | 233  | 5.935459748  | -5.028754579 | hyper |
| GAB2         | 17794541  | 17795150  | 29 | 609  | 1.522340458  | -5.671550211 | hyper |
| ENTPD7       | 20656021  | 20656320  | 26 | 299  | 2.077494521  | -5.202627903 | hyper |
| LOC100299268 | 51613621  | 51613940  | 18 | 319  | 5.942514505  | -5.416192589 | hyper |
| TMEM110      | 48000341  | 48000556  | 22 | 215  | 2.802516365  | -5.204364925 | hyper |
| LIPH         | 81681395  | 81681680  | 1  | 285  | 4.263034406  | -5.421792954 | hyper |
| FAM46A       | 21497816  | 21498260  | 9  | 444  | 1.61693489   | -5.28323943  | hyper |
| SLC35F3      | 7136854   | 7137074   | 28 | 220  | 5.916476644  | -5.147675438 | hyper |
| MOB3B        | 16926751  | 16926954  | 8  | 203  | 1.324091867  | -5.118184718 | hyper |
| ZNF394       | 36908941  | 36909440  | 25 | 499  | 2.6604527    | -5.061602111 | hyper |
| RFX3         | 40970201  | 40970580  | 8  | 379  | 3.469969978  | -5.08660388  | hyper |
| LOC788263    | 47313301  | 47313661  | 15 | 360  | 2.870670408  | -5.514970469 | hyper |
| HNRNPF       | 13809861  | 13810260  | 28 | 399  | 1.925809102  | -5.031569184 | hyper |
| HEATR4       | 84967915  | 84968140  | 10 | 225  | 5.916476644  | -5.147675438 | hyper |
| LOC107131258 | 26328701  | 26329060  | 23 | 359  | 2.71596199   | -5.220441675 | hyper |
| LOC100337392 | 45914561  | 45914940  | 15 | 379  | 5.916476644  | -5.147675438 | hyper |
| FNIP2        | 40197537  | 40197780  | 17 | 243  | 3.05087233   | -5.267041868 | hyper |
| PPM1K        | 36449276  | 36449740  | 6  | 464  | 3.969083923  | -5.040595636 | hyper |
| PLA2G15      | 35624572  | 35624811  | 18 | 239  | 4.109121722  | -5.228736878 | hyper |
| NR4A3        | 64872306  | 64872841  | 8  | 535  | 3.279116515  | -5.19345951  | hyper |
| POLR3H       | 112629153 | 112629520 | 5  | 367  | 1.795887094  | -5.069656414 | hyper |
| CMYA5        | 10726601  | 10727040  | 10 | 439  | 4.128104826  | -5.135067485 | hyper |
| ATP1B4       | 4934692   | 4934900   | 30 | 208  | 5.722466024  | -5.513673098 | hyper |
| ENAM         | 86003461  | 86003840  | 6  | 379  | 4.191426071  | -5.15121647  | hyper |
| PRDM1        | 43864287  | 43864536  | 9  | 249  | 3.12657754   | -5.535305193 | hyper |
| GOLGA3       | 44466921  | 44467240  | 17 | 319  | -1.428167544 | -7.052437896 | hypo  |
| CHD8         | 25769821  | 25770783  | 10 | 962  | -1.026150492 | -5.059181906 | hypo  |
| PCDHGA2      | 52455181  | 52456287  | 7  | 1106 | -2.099600958 | -5.367335648 | hypo  |
| LOC100848991 | 58759742  | 58760200  | 18 | 458  | -1.213171555 | -5.160352094 | hypo  |
| CGNL1        | 52767161  | 52767840  | 10 | 679  | -3.339736552 | -5.05280164  | hypo  |
| DCBLD1       | 33250961  | 33251806  | 9  | 845  | -1.380468828 | -5.034649657 | hypo  |
| WNT5A        | 45553086  | 45553379  | 22 | 293  | -1.354391281 | -6.646034128 | hypo  |
| SH3RF2       | 57275082  | 57275414  | 7  | 332  | -1.332755165 | -5.681022392 | hypo  |
| RHOBTB2      | 70315581  | 70315890  | 8  | 309  | -2.250643824 | -7.117718765 | hypo  |
| BTBD3        | 5466181   | 5466741   | 13 | 560  | -1.260218408 | -6.386586942 | hypo  |
| PCDHGA2      | 52493284  | 52493980  | 7  | 696  | -1.318161712 | -5.92819293  | hypo  |
| LOC101904667 | 17434328  | 17435346  | 8  | 1018 | -2.203394075 | -6.798892233 | hypo  |
| LYL1         | 12478141  | 12479660  | 7  | 1519 | -1.887943682 | -7.1203412   | hypo  |
| LRFN3        | 46636505  | 46637139  | 18 | 634  | -2.777961137 | -6.719192676 | hypo  |
| ZNF362       | 120410441 | 120411849 | 2  | 1408 | -3.871843649 | -7.08910195  | hypo  |
| ZNF629       | 26899701  | 26901020  | 25 | 1319 | -1.858995552 | -5.687979885 | hypo  |
| EPC1         | 33214573  | 33214926  | 13 | 353  | -2.514144336 | -5.671512031 | hypo  |
| SAV1         | 43552321  | 43552580  | 10 | 259  | -1.100038537 | -5.699531015 | hypo  |
| FAM212A      | 50430254  | 50431096  | 22 | 842  | -1.302309175 | -6.108207632 | hypo  |
| POP7         | 35885040  | 35885723  | 25 | 683  | -1.164622012 | -6.684983613 | hypo  |
| GABPB1       | 59966045  | 59966460  | 10 | 415  | -2.091593592 | -6.020930243 | hypo  |
| GTF3C6       | 39366981  | 39367381  | 9  | 400  | -4.15204082  | -7.697804155 | hypo  |
| ZNF48        | 26577034  | 26579060  | 25 | 2026 | -1.833480807 | -6.214084157 | hypo  |
| NISCH        | 48370593  | 48371826  | 22 | 1233 | -1.422427077 | -5.180905404 | hypo  |
| BIVM         | 79039769  | 79040367  | 12 | 598  | -1.529576443 | -5.057020321 | hypo  |
| PCLO         | 37653075  | 37654120  | 4  | 1045 | -1.825993558 | -5.070945039 | hypo  |
| H2AFY        | 46804741  | 46805760  | 7  | 1019 | -1.645415018 | -5.374931777 | hypo  |
| RNF14        | 53044387  | 53044915  | 7  | 528  | -1.134453287 | -6.4678026   | hypo  |
| LOC787554    | 57752401  | 57753180  | 18 | 779  | -1.667958145 | -6.806414711 | hypo  |

|              |           |           |                    |      |              |              |      |
|--------------|-----------|-----------|--------------------|------|--------------|--------------|------|
| C10H14orf93  | 21857877  | 21858614  | 10                 | 737  | -2.143512326 | -5.408202389 | hypo |
| PC           | 44866414  | 44866636  | 29                 | 222  | -1.800769025 | -6.270578832 | hypo |
| GTF2IRD2     | 32749181  | 32750280  | 25                 | 1099 | -1.515474106 | -5.087698179 | hypo |
| ATP8B3       | 44124706  | 44125254  | 7                  | 548  | -2.682410395 | -5.661512382 | hypo |
| CYP2U1       | 17263221  | 17264295  | 6                  | 1074 | -2.307828345 | -5.765273086 | hypo |
| SMIM33       | 50735821  | 50736420  | 7                  | 599  | -3.605324662 | -7.055516653 | hypo |
| MZF1         | 65786621  | 65788180  | 18                 | 1559 | -1.360734428 | -5.819533944 | hypo |
| PCYOX1L      | 60766578  | 60767400  | 7                  | 822  | -2.25228114  | -5.448005724 | hypo |
| NGRN         | 21640616  | 21641460  | 21                 | 844  | -1.22255051  | -6.667680594 | hypo |
| SWT1         | 66185812  | 66186460  | 16                 | 648  | -1.819588274 | -5.54308801  | hypo |
| LOC616254    | 48249684  | 48250188  | 19                 | 504  | -4.054397088 | -7.438602677 | hypo |
| LINS1        | 6056021   | 6056280   | 21                 | 259  | -3.038860256 | -5.823987114 | hypo |
| PCDHGC3      | 52565850  | 52566460  | 7                  | 610  | -3.029226139 | -6.027129117 | hypo |
| ADNP         | 78822001  | 78822520  | 13                 | 519  | -1.542377819 | -6.034301802 | hypo |
| ZNF672       | 42627633  | 42629560  | 7                  | 1927 | -1.748518503 | -6.177944938 | hypo |
| ST3GAL5      | 49034215  | 49034620  | 11                 | 405  | -2.069974164 | -6.651852378 | hypo |
| TMEM200A     | 68537650  | 68537860  | 9                  | 210  | -2.157834825 | -7.298937858 | hypo |
| NLGN1        | 93148881  | 93149587  | 1                  | 706  | -1.647874784 | -6.516927057 | hypo |
| USP40        | 113174905 | 113175760 | 3                  | 855  | -1.544089482 | -6.607146469 | hypo |
| SMTNL2       | 25103813  | 25104056  | 19                 | 243  | -1.475535839 | -6.624599993 | hypo |
| FBXL4        | 50878775  | 50879088  | 9                  | 313  | -3.060959915 | -5.109666995 | hypo |
| FSD2         | 23059108  | 23059814  | 21                 | 706  | -3.289577895 | -7.646816498 | hypo |
| HOXB3        | 37938677  | 37939274  | 19                 | 597  | -4.427506851 | -7.836555557 | hypo |
| IFIH1        | 34111841  | 34112180  | 2                  | 339  | -4.712646963 | -5.009390924 | hypo |
| ANKRD17      | 88215901  | 88216197  | 6                  | 296  | -1.320931261 | -6.507368823 | hypo |
| TIA1         | 68516241  | 68516980  | 11                 | 739  | -2.047433562 | -6.550154044 | hypo |
| CCDC88A      | 38037220  | 38037498  | 11                 | 278  | -1.167758125 | -6.270020713 | hypo |
| LOC112441465 | 54447     | 55400     | NW_020<br>192290.1 | 953  | -1.261867379 | -6.182214791 | hypo |
| NIPBL        | 37165621  | 37166180  | 20                 | 559  | -1.556474086 | -5.632707752 | hypo |
| ANKRD27      | 43093681  | 43094120  | 18                 | 439  | -1.252581598 | -6.410283318 | hypo |
| YIPF5        | 55260101  | 55260517  | 7                  | 416  | -1.677333303 | -5.015936657 | hypo |
| SMAD1        | 12760634  | 12760892  | 17                 | 258  | -1.585302222 | -5.309838636 | hypo |
| RHOBTB2      | 70304749  | 70305774  | 8                  | 1025 | -1.809423092 | -6.50029059  | hypo |
| ADAMTS6      | 14332221  | 14332760  | 20                 | 539  | -2.360621138 | -7.201696429 | hypo |
| PCDHGA2      | 52449101  | 52450343  | 7                  | 1242 | -1.582862677 | -7.072860133 | hypo |
| UBR4         | 133588917 | 133589505 | 2                  | 588  | -1.123031472 | -6.401641519 | hypo |
| LOC404051    | 50772853  | 50774989  | 23                 | 2136 | -2.511708188 | -5.776257746 | hypo |
| NUDT2        | 75734821  | 75735276  | 8                  | 455  | -1.888169619 | -5.949399496 | hypo |
| LOC616254    | 48204341  | 48205197  | 19                 | 856  | -3.25836759  | -5.327798546 | hypo |
| MLH3         | 86296841  | 86297360  | 10                 | 519  | -3.614805746 | -6.252162715 | hypo |
| LOC100848264 | 112836    | 113700    | 27                 | 864  | -1.181266063 | -5.302347816 | hypo |
| IL17RD       | 44001021  | 44001886  | 22                 | 865  | -1.248511298 | -6.970855083 | hypo |
| FAM120B      | 104016321 | 104016960 | 9                  | 639  | -3.36390529  | -5.154164329 | hypo |
| ZBTB37       | 55249761  | 55251040  | 16                 | 1279 | -1.82853365  | -6.354841724 | hypo |
| AUTS2        | 29783941  | 29785459  | 25                 | 1518 | -3.040961173 | -7.222697484 | hypo |
| SCN1A        | 30317701  | 30319040  | 2                  | 1339 | -1.52895173  | -5.166488175 | hypo |
| QPR1         | 26491478  | 26491965  | 25                 | 487  | -2.733481204 | -5.428904652 | hypo |
| RIMS2        | 60789672  | 60789900  | 14                 | 228  | -1.953858218 | -5.409897945 | hypo |
| STARD13      | 28011073  | 28011520  | 12                 | 447  | -1.30901598  | -5.234173487 | hypo |
| FAM19A3      | 30599241  | 30600136  | 3                  | 895  | -2.9274875   | -5.904511153 | hypo |
| CHST3        | 28096321  | 28097380  | 28                 | 1059 | -1.073555298 | -5.72350155  | hypo |
| CREB3L2      | 101652058 | 101652275 | 4                  | 217  | -1.500568116 | -5.424767944 | hypo |
| ZBTB38       | 127531661 | 127532040 | 1                  | 379  | -2.068145254 | -5.096570922 | hypo |
| KRT15        | 41725881  | 41726453  | 19                 | 572  | -2.705039849 | -5.207425552 | hypo |
| CHAMP1       | 87094821  | 87095920  | 12                 | 1099 | -1.898177733 | -6.347839693 | hypo |
| SVIL         | 34658759  | 34659435  | 13                 | 676  | -1.282027582 | -5.013629805 | hypo |
| SHISAL1      | 114933821 | 114935060 | 5                  | 1239 | -1.164445072 | -5.445480745 | hypo |

|              |           |           |                    |      |              |              |      |
|--------------|-----------|-----------|--------------------|------|--------------|--------------|------|
| PCDHGA2      | 52479981  | 52482060  | 7                  | 2079 | -1.93301445  | -5.395248203 | hypo |
| KDM3B        | 49779083  | 49779285  | 7                  | 202  | -1.824888272 | -5.49624498  | hypo |
| SMARCA2      | 42399285  | 42399503  | 8                  | 218  | -1.302623034 | -5.399332863 | hypo |
| RNF7         | 127215261 | 127215750 | 1                  | 489  | -1.517909138 | -5.354213983 | hypo |
| PHF2         | 84988697  | 84989088  | 8                  | 391  | -2.070266039 | -5.51490888  | hypo |
| GPR68        | 55998981  | 56001240  | 21                 | 2259 | -1.709011709 | -6.947415276 | hypo |
| FAT2         | 62750681  | 62751100  | 7                  | 419  | -3.220014318 | -7.328716333 | hypo |
| WNT5A        | 45557541  | 45557780  | 22                 | 239  | -1.48416075  | -5.263846234 | hypo |
| FAT2         | 62700961  | 62701459  | 7                  | 498  | -3.457716167 | -7.63531905  | hypo |
| BMPR1B       | 29374521  | 29374880  | 6                  | 359  | -2.389233422 | -7.414887212 | hypo |
| AK1          | 98539801  | 98540254  | 11                 | 453  | -1.087554871 | -7.1782611   | hypo |
| BICDL1       | 62470829  | 62472165  | 17                 | 1336 | -1.144658243 | -5.223882579 | hypo |
| ZNF33B       | 12828181  | 12829180  | 28                 | 999  | -2.469043213 | -7.199865989 | hypo |
| APEX2        | 92482821  | 92483780  | 30                 | 959  | -1.441029936 | -6.457768521 | hypo |
| GOLGB1       | 66176846  | 66178740  | 1                  | 1894 | -1.000705741 | -5.14743787  | hypo |
| NXPE3        | 46164521  | 46165340  | 1                  | 819  | -2.203737755 | -5.656229483 | hypo |
| CXXC5        | 50885336  | 50885560  | 7                  | 224  | -2.036917859 | -5.184158036 | hypo |
| PCDHGA2      | 52488701  | 52490560  | 7                  | 1859 | -1.933926334 | -6.821976044 | hypo |
| RASSF6       | 88622881  | 88623178  | 6                  | 297  | -2.90276906  | -5.789824603 | hypo |
| ARRDC3       | 90841601  | 90842294  | 7                  | 693  | -3.897610329 | -6.947613804 | hypo |
| TSC22D1      | 14800261  | 14802120  | 12                 | 1859 | -1.080892927 | -5.644349975 | hypo |
| ADAT1        | 2890621   | 2891883   | 18                 | 1262 | -1.286117234 | -7.016209136 | hypo |
| ZFP41        | 1334251   | 1335220   | 14                 | 969  | -1.952166569 | -6.600196351 | hypo |
| CPM          | 44957366  | 44958820  | 5                  | 1454 | -1.872716795 | -6.475772628 | hypo |
| LPAR2        | 3706927   | 3707940   | 7                  | 1013 | -1.20487297  | -6.176424264 | hypo |
| TNFRSF21     | 20419301  | 20419632  | 23                 | 331  | -1.324094663 | -5.793053135 | hypo |
| ESPN         | 46916463  | 46916727  | 16                 | 264  | -3.095157233 | -7.302362753 | hypo |
| GLUL         | 63469241  | 63469740  | 16                 | 499  | -1.628058152 | -6.446877621 | hypo |
| DSG3         | 25670569  | 25670817  | 24                 | 248  | -1.417500432 | -6.137678228 | hypo |
| PML          | 34575881  | 34577657  | 21                 | 1776 | -1.242367827 | -6.68215292  | hypo |
| SREBF1       | 34648441  | 34649200  | 19                 | 759  | -1.264623145 | -7.093788128 | hypo |
| AGPAT1       | 27216141  | 27216840  | 23                 | 699  | -1.562437242 | -6.876771566 | hypo |
| LOC100848799 | 52319261  | 52319860  | 7                  | 599  | -4.301869235 | -8.061056492 | hypo |
| ZNF879       | 2337681   | 2338277   | 7                  | 596  | -3.046350316 | -6.002250573 | hypo |
| FAM131B      | 106739321 | 106739540 | 4                  | 219  | -2.654691591 | -5.085817249 | hypo |
| ZNF436       | 129483381 | 129484100 | 2                  | 719  | -1.730497819 | -5.377719549 | hypo |
| FZR1         | 20384761  | 20385890  | 7                  | 1129 | -1.121036138 | -6.078906374 | hypo |
| IFNT3        | 22583081  | 22583460  | 8                  | 379  | -2.441328347 | -5.1111399   | hypo |
| LOC509034    | 86905421  | 86907360  | 10                 | 1939 | -1.515033582 | -5.386221595 | hypo |
| ZNF398       | 112282461 | 112283480 | 4                  | 1019 | -1.506479094 | -5.446380373 | hypo |
| SLIT2        | 40182648  | 40183640  | 6                  | 992  | -2.930714353 | -7.321085461 | hypo |
| LOC112445429 | 13413     | 13800     | NW_020<br>190482.1 | 387  | -1.793613843 | -5.392404071 | hypo |
| KRT6A        | 27384761  | 27384980  | 5                  | 219  | -1.106955341 | -6.296008734 | hypo |
| LOC512672    | 28504701  | 28505222  | 23                 | 521  | -1.962967293 | -5.114584405 | hypo |
| CTDSP1       | 106412733 | 106413200 | 2                  | 467  | -2.470980251 | -6.546638106 | hypo |
| KANK1        | 43798814  | 43800140  | 8                  | 1326 | -1.995378442 | -6.296326293 | hypo |
| FOXN1        | 20001368  | 20001860  | 19                 | 492  | -2.949545285 | -7.233336368 | hypo |
| CASP4        | 3269041   | 3269300   | 15                 | 259  | -2.01729901  | -5.185842361 | hypo |
| DGKA         | 57353449  | 57353900  | 5                  | 451  | -1.42036604  | -5.020905835 | hypo |
| ABO          | 104177521 | 104178340 | 11                 | 819  | -3.218190476 | -5.694329081 | hypo |
| ZNF699       | 14193801  | 14194300  | 7                  | 499  | -2.248486546 | -5.853561225 | hypo |
| LRP4         | 76788761  | 76789809  | 15                 | 1048 | -1.32238544  | -7.03396718  | hypo |
| THRAP3       | 109553441 | 109554026 | 3                  | 585  | -1.003147861 | -5.150185847 | hypo |
| GAA          | 52482890  | 52483760  | 19                 | 870  | -1.997164235 | -5.440597546 | hypo |
| RHOV         | 36410981  | 36411525  | 10                 | 544  | -1.989277121 | -5.048089186 | hypo |
| LOC101903385 | 65803501  | 65805430  | 18                 | 1929 | -2.196545882 | -7.430367747 | hypo |
| ELAC1        | 50486701  | 50487340  | 24                 | 639  | -2.398993799 | -7.386320401 | hypo |

|              |           |           |    |      |              |              |      |
|--------------|-----------|-----------|----|------|--------------|--------------|------|
| GALNT10      | 65702401  | 65702920  | 7  | 519  | -1.089255099 | -6.133759389 | hypo |
| ZC3H10       | 57199161  | 57200875  | 5  | 1714 | -1.274650315 | -5.199089467 | hypo |
| GID8         | 54464732  | 54465541  | 13 | 809  | -1.125193764 | -6.233820765 | hypo |
| TCF12        | 53025341  | 53025721  | 10 | 380  | -1.535523015 | -7.265106008 | hypo |
| ZDHHC14      | 94301451  | 94302160  | 9  | 709  | -2.534468069 | -6.719638326 | hypo |
| PCLO         | 37655141  | 37656820  | 4  | 1679 | -1.547132284 | -5.101059486 | hypo |
| ZSCAN29      | 55118024  | 55118600  | 21 | 576  | -1.715192024 | -5.217767243 | hypo |
| PARP14       | 67048941  | 67049521  | 1  | 580  | -1.391805193 | -5.419881715 | hypo |
| PCLO         | 37656881  | 37657900  | 4  | 1019 | -2.8547187   | -7.233168787 | hypo |
| TDRD7        | 62707814  | 62708317  | 8  | 503  | -1.151500845 | -5.043484899 | hypo |
| ZNF189       | 91130381  | 91131040  | 8  | 659  | -1.906056133 | -5.514357038 | hypo |
| TBCEL        | 31710835  | 31711100  | 15 | 265  | -2.489948045 | -5.711957559 | hypo |
| USP32        | 12776618  | 12777043  | 19 | 425  | -1.324915974 | -7.093319489 | hypo |
| FAM114A1     | 58099794  | 58100150  | 6  | 356  | -1.230343674 | -5.441185501 | hypo |
| MOCS3        | 78872161  | 78873020  | 13 | 859  | -1.511722013 | -5.119237862 | hypo |
| TOR3A        | 60450181  | 60450680  | 16 | 499  | -2.244706829 | -5.174331133 | hypo |
| VEZF1        | 8784801   | 8785348   | 19 | 547  | -1.307672563 | -5.123181949 | hypo |
| LOC616254    | 48203421  | 48204000  | 19 | 579  | -3.175212833 | -6.889027149 | hypo |
| SPATS2       | 30456719  | 30457061  | 5  | 342  | -1.723681371 | -7.2808377   | hypo |
| GLT8D1       | 48168886  | 48169414  | 22 | 528  | -1.654499165 | -5.288556541 | hypo |
| IQCE         | 40709997  | 40711120  | 25 | 1123 | -1.693065909 | -6.567535124 | hypo |
| TP53         | 27379912  | 27380167  | 19 | 255  | -2.259919726 | -6.930330945 | hypo |
| ITGB8        | 29115099  | 29115480  | 4  | 381  | -2.45869378  | -5.379913015 | hypo |
| MAGED2       | 92288221  | 92288463  | 30 | 242  | -2.260255575 | -5.862662728 | hypo |
| HEATR6       | 14133061  | 14133687  | 19 | 626  | -1.05468491  | -5.796318592 | hypo |
| GLYCTK       | 48590041  | 48590941  | 22 | 900  | -2.604926431 | -7.469063703 | hypo |
| LOC782688    | 27769347  | 27770080  | 29 | 733  | -1.526671989 | -5.511407912 | hypo |
| TTYH3        | 40748396  | 40749520  | 25 | 1124 | -1.032097115 | -5.516949627 | hypo |
| MYO5A        | 57992607  | 57992847  | 10 | 240  | -1.600131485 | -5.328051866 | hypo |
| FLYWCH1      | 2352981   | 2353440   | 25 | 459  | -1.442996475 | -5.46462142  | hypo |
| PIK3IP1      | 70094941  | 70095260  | 17 | 319  | -2.679316427 | -5.215943314 | hypo |
| NACAD        | 76545121  | 76546580  | 4  | 1459 | -8.388017285 | -7.657039282 | hypo |
| VEZF1        | 8782602   | 8782804   | 19 | 202  | -1.281582416 | -6.195305404 | hypo |
| DNAJC28      | 2028921   | 2030540   | 1  | 1619 | -2.238182198 | -5.660356825 | hypo |
| CNOT2        | 43134290  | 43134660  | 5  | 370  | -1.343313847 | -7.451538773 | hypo |
| KIAA1143     | 16500741  | 16501083  | 22 | 342  | -1.634638128 | -6.104043324 | hypo |
| NCOA6        | 64072081  | 64073099  | 13 | 1018 | -1.064396439 | -6.930290042 | hypo |
| NMT2         | 29682321  | 29683456  | 13 | 1135 | -1.13650959  | -6.380375197 | hypo |
| CHD2         | 14043961  | 14044440  | 21 | 479  | -1.893445619 | -6.965201771 | hypo |
| ZNF469       | 13703501  | 13709920  | 18 | 6419 | -3.395047487 | -5.679064909 | hypo |
| PLEKHD1      | 81276041  | 81276880  | 10 | 839  | -2.48570332  | -6.996910047 | hypo |
| PDGFC        | 42479081  | 42479520  | 17 | 439  | -2.29730181  | -5.807939364 | hypo |
| MBLAC1       | 36331801  | 36333031  | 25 | 1230 | -1.277567524 | -7.03530189  | hypo |
| LOC112449367 | 11212141  | 11213008  | 13 | 867  | -1.272938749 | -5.416279256 | hypo |
| ZDHHC8       | 73013461  | 73014360  | 17 | 899  | -1.130789444 | -6.057774551 | hypo |
| IRF1         | 21944841  | 21945380  | 7  | 539  | -3.006619701 | -5.375662387 | hypo |
| SHLD2        | 41727641  | 41728780  | 28 | 1139 | -2.082149041 | -5.465850806 | hypo |
| MB21D2       | 74608690  | 74609955  | 1  | 1265 | -1.195620496 | -7.518320714 | hypo |
| FOXP2        | 53770721  | 53771260  | 4  | 539  | -2.102199819 | -5.671056831 | hypo |
| YAF2         | 38537721  | 38538380  | 5  | 659  | -2.081912483 | -6.603034482 | hypo |
| EDNRA        | 10597821  | 10598376  | 17 | 555  | -2.409534409 | -5.064704319 | hypo |
| CEBPA        | 43728247  | 43729478  | 18 | 1231 | -1.53906088  | -6.296649272 | hypo |
| KLHDC10      | 93922335  | 93922780  | 4  | 445  | -1.140285964 | -5.139756799 | hypo |
| RXRA         | 105113941 | 105114880 | 11 | 939  | -1.020873237 | -5.383940747 | hypo |
| HSPBAP1      | 67064461  | 67065078  | 1  | 617  | -1.568160487 | -7.239822832 | hypo |
| IMMP1L       | 62219261  | 62220020  | 15 | 759  | -1.370915269 | -5.702178909 | hypo |
| ANKRD39      | 2808141   | 2809028   | 11 | 887  | -1.014836802 | -7.555434796 | hypo |
| NR2F1        | 93061046  | 93062000  | 7  | 954  | -1.003901383 | -6.512896399 | hypo |

|              |           |           |    |      |              |              |      |
|--------------|-----------|-----------|----|------|--------------|--------------|------|
| CELSR1       | 116796323 | 116799460 | 5  | 3137 | -1.201447265 | -6.236037257 | hypo |
| ZBTB38       | 127532121 | 127532380 | 1  | 259  | -1.787507077 | -6.982127662 | hypo |
| LDLRAD4      | 43477026  | 43478080  | 24 | 1054 | -2.421517208 | -5.023994284 | hypo |
| ZFHx2        | 21418646  | 21419860  | 10 | 1214 | -1.945082558 | -5.360773708 | hypo |
| NAT1         | 39015901  | 39016322  | 27 | 421  | -1.593713711 | -6.035518383 | hypo |
| ZSWIM3       | 74637195  | 74637940  | 13 | 745  | -1.509518398 | -5.020153809 | hypo |
| TRIM65       | 55731801  | 55732300  | 19 | 499  | -2.298501773 | -5.360214491 | hypo |
| NAV2         | 24802681  | 24804435  | 29 | 1754 | -1.620341231 | -5.519260829 | hypo |
| ZNF3         | 36376621  | 36377100  | 25 | 479  | -2.136329032 | -6.575820667 | hypo |
| LOC107133032 | 18204961  | 18205900  | 13 | 939  | -2.791335937 | -7.219949701 | hypo |
| SH3D19       | 6676404   | 6676669   | 17 | 265  | -2.192403708 | -7.155579178 | hypo |
| PCDHGA2      | 52485101  | 52486547  | 7  | 1446 | -1.568049118 | -5.480614465 | hypo |
| SLC24A1      | 12546362  | 12547292  | 10 | 930  | -3.130687363 | -5.248095227 | hypo |
| C25H16orf89  | 4070000   | 4070353   | 25 | 353  | -2.36532635  | -6.912546906 | hypo |
| PCLO         | 37685641  | 37686857  | 4  | 1216 | -2.70497183  | -5.952550078 | hypo |
| HS3ST3A1     | 31738491  | 31739113  | 19 | 622  | -2.165059246 | -6.676566257 | hypo |
| CBFA2T2      | 63098081  | 63098880  | 13 | 799  | -2.18031227  | -5.632250761 | hypo |
| THAP2        | 1306958   | 1307460   | 5  | 502  | -2.589132252 | -6.803085675 | hypo |
| ZSCAN20      | 112321921 | 112323488 | 3  | 1567 | -1.835351451 | -5.337532751 | hypo |
| IFNAR2       | 2315590   | 2315960   | 1  | 370  | -2.265586087 | -5.008212583 | hypo |
| HTRA1        | 42342452  | 42342900  | 26 | 448  | -1.03201086  | -5.695086326 | hypo |
| MMP1         | 5820681   | 5820952   | 15 | 271  | -2.332310113 | -7.30646241  | hypo |
| TNRC18       | 38909643  | 38911383  | 25 | 1740 | -1.166719991 | -6.250459085 | hypo |
| PCDHGA2      | 52511811  | 52512620  | 7  | 809  | -2.571379947 | -5.853256371 | hypo |
| THAP8        | 46703161  | 46703637  | 18 | 476  | -2.297430562 | -7.794981691 | hypo |
| LOC618787    | 4967401   | 4969760   | 7  | 2359 | -1.629801932 | -6.346940942 | hypo |
| SAMD9        | 10451101  | 10451857  | 4  | 756  | -1.633401832 | -6.859380752 | hypo |
| PCDHGA2      | 52470921  | 52471994  | 7  | 1073 | -2.067535331 | -5.873647013 | hypo |
| DUOXA2       | 65309201  | 65309514  | 10 | 313  | -1.849131725 | -5.038011075 | hypo |
| CELSR2       | 34153741  | 34157401  | 3  | 3660 | -1.469224046 | -6.385267731 | hypo |
| TLCD1        | 20148861  | 20149560  | 19 | 699  | -1.92835789  | -5.357622353 | hypo |
| LTBP3        | 43734503  | 43735240  | 29 | 737  | -1.529660798 | -5.022776371 | hypo |
| LOC616254    | 48235186  | 48235992  | 19 | 806  | -8.727920455 | -8.42802011  | hypo |
| SPOCK1       | 48366781  | 48367233  | 7  | 452  | -3.547900406 | -7.819764125 | hypo |
| FAT2         | 62774561  | 62775341  | 7  | 780  | -3.077485471 | -5.492806294 | hypo |
| P2RY2        | 52723080  | 52724900  | 15 | 1820 | -2.701815211 | -5.909246176 | hypo |
| FAM20C       | 42135203  | 42136026  | 25 | 823  | -2.052929886 | -5.536752322 | hypo |
| VWC2         | 5990776   | 5991340   | 4  | 564  | -4.267823683 | -7.859661945 | hypo |
| DYNAP        | 54013521  | 54013960  | 24 | 439  | -2.614924113 | -7.560036345 | hypo |
| PATZ1        | 70142261  | 70143759  | 17 | 1498 | -3.100417051 | -5.116339635 | hypo |
| BMP7         | 58889621  | 58890520  | 13 | 899  | -1.68856408  | -6.552109955 | hypo |
| ZNF518A      | 17503981  | 17506000  | 26 | 2019 | -1.188250992 | -5.706414836 | hypo |
| JADE2        | 46100346  | 46100811  | 7  | 465  | -1.532631548 | -6.574760846 | hypo |
| PHF20        | 65011906  | 65012291  | 13 | 385  | -1.065103992 | -6.331167496 | hypo |
| SETMAR       | 22017101  | 22018264  | 22 | 1163 | -3.395798804 | -7.625623899 | hypo |
| NLRX1        | 29756069  | 29756885  | 15 | 816  | -1.110711373 | -5.732308157 | hypo |
| APC2         | 43874981  | 43877340  | 7  | 2359 | -2.057769594 | -5.01278269  | hypo |
| PSMB8        | 7173061   | 7173360   | 23 | 299  | -1.787689727 | -5.723485462 | hypo |
| SETD1B       | 53492651  | 53493890  | 17 | 1239 | -1.398408551 | -5.207410366 | hypo |
| PHLDB1       | 29310061  | 29310613  | 15 | 552  | -1.088433447 | -5.211328793 | hypo |
| LOC101904962 | 20385256  | 20386119  | 12 | 863  | -2.588397176 | -6.791869102 | hypo |
| ROBO1        | 26157756  | 26158092  | 1  | 336  | -1.933909042 | -5.389539415 | hypo |
| C2H2orf88    | 6103941   | 6104600   | 2  | 659  | -2.845406968 | -5.989847885 | hypo |
| FRMD4B       | 32381001  | 32381280  | 22 | 279  | -2.317290132 | -7.205349826 | hypo |
| FAT2         | 62772073  | 62773080  | 7  | 1007 | -2.637102662 | -5.110919848 | hypo |
| SPPL3        | 63027921  | 63028512  | 17 | 591  | -1.269196612 | -5.946933263 | hypo |
| TSNARE1      | 1976638   | 1977073   | 14 | 435  | -3.335390355 | -6.77883175  | hypo |
| UBTD2        | 3997790   | 3998381   | 20 | 591  | -1.422826301 | -5.930254005 | hypo |

|              |           |           |    |      |              |              |      |
|--------------|-----------|-----------|----|------|--------------|--------------|------|
| ZNF362       | 120425925 | 120426150 | 2  | 225  | -3.141958145 | -7.259351341 | hypo |
| PCDHGA2      | 52425021  | 52426520  | 7  | 1499 | -2.979997655 | -6.026349224 | hypo |
| LOC104973427 | 73946821  | 73947113  | 11 | 292  | -1.231449229 | -5.160989978 | hypo |
| ZSCAN29      | 55121154  | 55121590  | 21 | 436  | -1.348060453 | -7.139571417 | hypo |
| NUPR1        | 26082045  | 26082342  | 25 | 297  | -1.830591289 | -6.982465061 | hypo |
| TGFB2        | 21808221  | 21808712  | 16 | 491  | -1.401904827 | -6.635532506 | hypo |
| PCDHGA2      | 52464261  | 52466780  | 7  | 2519 | -1.538321776 | -5.168167584 | hypo |
| TLR4         | 107065850 | 107066700 | 8  | 850  | -2.571382412 | -6.11543578  | hypo |
| TBCEL        | 31648678  | 31649180  | 15 | 502  | -2.6143917   | -6.597941998 | hypo |
| SCN1B        | 45780781  | 45781391  | 18 | 610  | -1.778168084 | -7.014828437 | hypo |
| ABO          | 104176829 | 104177300 | 11 | 471  | -2.908800186 | -6.326614518 | hypo |
| PHACTR4      | 124947253 | 124947649 | 2  | 396  | -1.1351186   | -5.60270989  | hypo |
| JAM3         | 32993965  | 32994720  | 29 | 755  | -1.430978083 | -5.362047185 | hypo |
| SMTNL2       | 25112573  | 25113046  | 19 | 473  | -1.287417495 | -7.011416004 | hypo |
| LOC508131    | 59603261  | 59604600  | 18 | 1339 | -1.620796963 | -7.295700934 | hypo |
| LOC509034    | 86903301  | 86904300  | 10 | 999  | -1.492046533 | -5.519390137 | hypo |
| ZFP30        | 47616401  | 47617640  | 18 | 1239 | -2.545722605 | -6.239388813 | hypo |
| NCOA5        | 74805344  | 74805671  | 13 | 327  | -1.737168206 | -5.182514005 | hypo |
| D2HGDH       | 120790672 | 120791380 | 3  | 708  | -1.984050794 | -6.710123812 | hypo |
| DOLK         | 99443607  | 99445560  | 11 | 1953 | -1.642616254 | -5.228015913 | hypo |
| USP30        | 63983619  | 63984400  | 17 | 781  | -1.635302389 | -6.91492258  | hypo |
| SLC16A5      | 56338721  | 56339873  | 19 | 1152 | -1.862138197 | -5.103635323 | hypo |
| PLCD3        | 44781285  | 44781916  | 19 | 631  | -1.78137277  | -5.033272295 | hypo |
| MYORG        | 75742781  | 75743920  | 8  | 1139 | -2.972632593 | -7.705401592 | hypo |
| LYSMD4       | 6826001   | 6826640   | 21 | 639  | -2.280391245 | -5.039114905 | hypo |
| NUDT18       | 69420700  | 69421720  | 8  | 1020 | -1.950545307 | -7.388820411 | hypo |
| SIX5         | 53308670  | 53309473  | 18 | 803  | -2.31307753  | -5.098338642 | hypo |
| IQCN         | 4930261   | 4931722   | 7  | 1461 | -1.445463595 | -6.191489788 | hypo |
| PPFIBP2      | 45065945  | 45066652  | 15 | 707  | -2.633473805 | -5.428986655 | hypo |
| TNF          | 27716701  | 27717280  | 23 | 579  | -6.47648719  | -7.618041013 | hypo |
| PCDHB8       | 52295921  | 52296740  | 7  | 819  | -2.170349573 | -6.241632773 | hypo |
| ZBED5        | 41821101  | 41821540  | 15 | 439  | -1.238389521 | -5.335661051 | hypo |
| PCDHB11      | 52339981  | 52341580  | 7  | 1599 | -2.807203704 | -5.858312934 | hypo |
| PNPLA6       | 16399808  | 16400764  | 7  | 956  | -1.916888408 | -5.11470339  | hypo |
| MBTPS2       | 121447841 | 121448660 | 30 | 819  | -1.723106026 | -5.606668828 | hypo |
| EXOC3L2      | 52898341  | 52898847  | 18 | 506  | -7.920055055 | -7.124749031 | hypo |
| ELOVL6       | 15358119  | 15358780  | 6  | 661  | -1.339297119 | -5.188937999 | hypo |
| LEO1         | 58439976  | 58440220  | 10 | 244  | -2.045674904 | -5.50133418  | hypo |
| MED18        | 125068741 | 125069534 | 2  | 793  | -1.076970234 | -5.290222686 | hypo |
| LOC100140915 | 63803123  | 63805300  | 18 | 2177 | -1.592702969 | -6.722283238 | hypo |
| ZBTB7A       | 19975401  | 19976865  | 7  | 1464 | -1.208550468 | -5.404979051 | hypo |
| GALNT7       | 5591750   | 5591959   | 8  | 209  | -1.13770433  | -5.999903247 | hypo |
| NOTCH3       | 7931023   | 7931356   | 7  | 333  | -2.579226131 | -5.850272683 | hypo |
| STIM2        | 46454460  | 46454860  | 6  | 400  | -1.402540438 | -5.02169793  | hypo |
| FAM83F       | 111390965 | 111392558 | 5  | 1593 | -1.664425037 | -5.321402416 | hypo |
| LRIF1        | 32421741  | 32422260  | 3  | 519  | -1.600642923 | -5.43800494  | hypo |
| ZNF407       | 3571881   | 3573080   | 24 | 1199 | -1.108857545 | -5.268614236 | hypo |
| RGL2         | 7465580   | 7465800   | 23 | 220  | -1.602280636 | -5.556234669 | hypo |
| STRBP        | 94273661  | 94274340  | 11 | 679  | -2.457373453 | -5.977728206 | hypo |
| ZADH2        | 3492266   | 3493320   | 24 | 1054 | -1.265691953 | -6.095754406 | hypo |
| PPP1R14A     | 48069556  | 48069952  | 18 | 396  | -1.332187737 | -5.138197175 | hypo |
| RASSF10      | 39680341  | 39682060  | 15 | 1719 | -3.567568238 | -5.375111174 | hypo |
| SWT1         | 66273161  | 66274077  | 16 | 916  | -2.431958439 | -6.124735024 | hypo |
| LOC112447087 | 79182641  | 79182962  | 6  | 321  | -3.587215183 | -5.6527049   | hypo |
| SLC43A2      | 22691001  | 22692199  | 19 | 1198 | -3.833432718 | -5.80960987  | hypo |
| LOC509034    | 86904341  | 86904660  | 10 | 319  | -1.313584636 | -5.158189335 | hypo |
| ZFYVE1       | 84486397  | 84487520  | 10 | 1123 | -1.230789075 | -7.136606247 | hypo |
| DHX34        | 54347361  | 54348354  | 18 | 993  | -1.344028397 | -5.27064442  | hypo |



|              |           |           |    |      |              |              |      |
|--------------|-----------|-----------|----|------|--------------|--------------|------|
| AMER1        | 96146401  | 96147260  | 30 | 859  | -1.536982472 | -5.478612416 | hypo |
| YPEL1        | 72081101  | 72082440  | 17 | 1339 | -1.850903223 | -5.537725286 | hypo |
| PCLO         | 37476302  | 37477660  | 4  | 1358 | -1.249387622 | -6.352684732 | hypo |
| GALNT5       | 39067668  | 39069640  | 2  | 1972 | -3.895901274 | -5.438170237 | hypo |
| RASSF6       | 88624116  | 88624580  | 6  | 464  | -2.223987147 | -7.29722425  | hypo |
| LOC786489    | 52259401  | 52260020  | 7  | 619  | -3.207800835 | -5.730894652 | hypo |
| RASA1        | 87039001  | 87039260  | 7  | 259  | -2.842436031 | -5.775307679 | hypo |
| PCDH18       | 20300135  | 20300940  | 17 | 805  | -2.062386641 | -7.328949608 | hypo |
| PYGO1        | 54831741  | 54832680  | 10 | 939  | -1.223747701 | -6.026231618 | hypo |
| LOC787102    | 52291241  | 52292340  | 7  | 1099 | -1.861565051 | -6.028726268 | hypo |
| RPS6KC1      | 70349441  | 70350163  | 16 | 722  | -1.421194308 | -6.548863501 | hypo |
| AGGF1        | 8202183   | 8202514   | 10 | 331  | -1.009944465 | -6.869474894 | hypo |
| FRMPD1       | 61863921  | 61865028  | 8  | 1107 | -3.088471445 | -7.879121141 | hypo |
| ATCAY        | 20079481  | 20080588  | 7  | 1107 | -1.784298854 | -7.032299037 | hypo |
| LCOR         | 18252001  | 18253980  | 26 | 1979 | -1.011484014 | -6.253779945 | hypo |
| ZNF410       | 85319301  | 85319580  | 10 | 279  | -1.241602695 | -5.254561505 | hypo |
| RPGR         | 104982661 | 104983554 | 30 | 893  | -1.305990553 | -7.234684069 | hypo |
| MAP1S        | 5408683   | 5408917   | 7  | 234  | -1.894415368 | -5.98387323  | hypo |
| PDGFC        | 42478159  | 42478540  | 17 | 381  | -2.074071042 | -6.822452859 | hypo |
| SERPINB6     | 50750581  | 50750964  | 23 | 383  | -3.60593663  | -6.314192298 | hypo |
| ID3          | 129297874 | 129298160 | 2  | 286  | -1.368495507 | -6.571732579 | hypo |
| LPAR6        | 18204041  | 18204700  | 12 | 659  | -1.830777331 | -6.8503753   | hypo |
| TANC1        | 37134921  | 37136403  | 2  | 1482 | -1.161088871 | -6.019737795 | hypo |
| ZFH2         | 21410453  | 21412480  | 10 | 2027 | -2.311175039 | -7.218597919 | hypo |
| FLRT2        | 97153541  | 97154204  | 10 | 663  | -1.640831801 | -6.889101357 | hypo |
| MYH15        | 53144341  | 53144640  | 1  | 299  | -2.544212465 | -6.978188233 | hypo |
| CDKN2B       | 22086721  | 22087035  | 8  | 314  | -1.364103616 | -5.350643139 | hypo |
| NFKB2        | 23025812  | 23026096  | 26 | 284  | -1.106264303 | -6.642506766 | hypo |
| FAM122A      | 44894737  | 44895472  | 8  | 735  | -1.343123205 | -6.151387615 | hypo |
| EXT2         | 74352266  | 74353120  | 15 | 854  | -1.082714266 | -5.557764763 | hypo |
| ANGPT4       | 60234003  | 60234780  | 13 | 777  | -8.613973587 | -7.877567048 | hypo |
| ZFH2         | 21420021  | 21421920  | 10 | 1899 | -2.404862102 | -5.491985286 | hypo |
| FAT2         | 62749681  | 62750500  | 7  | 819  | -3.771364438 | -5.445813867 | hypo |
| GLYR1        | 3883921   | 3884767   | 25 | 846  | -1.21570401  | -6.077511528 | hypo |
| TUBB4A       | 17987161  | 17987960  | 7  | 799  | -1.24038767  | -6.292669107 | hypo |
| RNF150       | 16867251  | 16867462  | 17 | 211  | -1.196950634 | -6.333621187 | hypo |
| MYO9A        | 18677041  | 18677814  | 10 | 773  | -1.434410081 | -6.054593335 | hypo |
| SLIT2        | 39779281  | 39780073  | 6  | 792  | -1.22152001  | -7.309034243 | hypo |
| CSF1         | 33495887  | 33496909  | 3  | 1022 | -1.72377847  | -5.000517837 | hypo |
| KIF3C        | 73493023  | 73494260  | 11 | 1237 | -1.207554984 | -6.480338651 | hypo |
| ZNF827       | 12577381  | 12578540  | 17 | 1159 | -3.57133316  | -7.441068528 | hypo |
| TIMP1        | 85943284  | 85943558  | 30 | 274  | -1.287346031 | -5.479796662 | hypo |
| SNX29        | 11277681  | 11278340  | 25 | 659  | -3.319513542 | -5.075526713 | hypo |
| EFNA4        | 15532625  | 15533332  | 3  | 707  | -1.4962763   | -6.693966451 | hypo |
| GLI3         | 79059610  | 79062140  | 4  | 2530 | -1.191996867 | -6.500339162 | hypo |
| OR9Q2        | 81371461  | 81372540  | 15 | 1079 | -5.350238491 | -7.872097327 | hypo |
| SIK3         | 27527545  | 27527885  | 15 | 340  | -1.651107503 | -6.601218114 | hypo |
| SLC43A2      | 22687301  | 22687660  | 19 | 359  | -4.522339506 | -7.480768196 | hypo |
| KEAP1        | 15009367  | 15010129  | 7  | 762  | -1.06517616  | -6.912102256 | hypo |
| LRFN3        | 46632141  | 46633581  | 18 | 1440 | -1.814419101 | -5.072022337 | hypo |
| ERCC6L2      | 82671470  | 82672000  | 8  | 530  | -1.877300709 | -5.89636694  | hypo |
| NCOA5        | 74798993  | 74799337  | 13 | 344  | -2.151764217 | -6.72672207  | hypo |
| MINDY2       | 51427521  | 51428180  | 10 | 659  | -2.063380201 | -5.311124378 | hypo |
| JADE2        | 46115941  | 46116600  | 7  | 659  | -3.154650312 | -5.850589502 | hypo |
| PCDHGA2      | 52442486  | 52443060  | 7  | 574  | -2.904688728 | -6.713229367 | hypo |
| MGC139164    | 60856341  | 60856760  | 18 | 419  | -2.679261526 | -6.273788248 | hypo |
| LOC532875    | 14765081  | 14766120  | 18 | 1039 | -1.100683334 | -6.456064016 | hypo |
| LOC101908039 | 22564341  | 22564800  | 8  | 459  | -2.430373428 | -5.662349414 | hypo |

|              |           |           |    |      |              |              |      |
|--------------|-----------|-----------|----|------|--------------|--------------|------|
| ZNF830       | 15119021  | 15120467  | 19 | 1446 | -1.433368429 | -6.431107031 | hypo |
| TMEM191C     | 72207601  | 72208529  | 17 | 928  | -1.202111857 | -5.166994162 | hypo |
| INHBB        | 72112661  | 72113180  | 2  | 519  | -1.553572082 | -5.409485546 | hypo |
| DLG3         | 79948621  | 79949270  | 30 | 649  | -1.883723542 | -5.891726187 | hypo |
| GPR153       | 47099213  | 47100280  | 16 | 1067 | -1.756313677 | -5.38932923  | hypo |
| RPUSD2       | 36170913  | 36171920  | 10 | 1007 | -1.260529623 | -7.640198348 | hypo |
| SPRED3       | 48204021  | 48205120  | 18 | 1099 | -1.958457738 | -5.465655773 | hypo |
| CCDC60       | 55895961  | 55896187  | 17 | 226  | -2.96211524  | -5.986368948 | hypo |
| NKPD1        | 52806782  | 52808887  | 18 | 2105 | -3.024993152 | -5.146191903 | hypo |
| LOC100336476 | 119472902 | 119474789 | 3  | 1887 | -1.854636555 | -5.145205449 | hypo |
| AP2M1        | 82970226  | 82970700  | 1  | 474  | -1.023084696 | -5.916195328 | hypo |
| TUBA4A       | 107200121 | 107200480 | 2  | 359  | -1.315975223 | -6.684450943 | hypo |
| TNRC18       | 38923070  | 38923500  | 25 | 430  | -1.266778147 | -6.78866265  | hypo |
| TMEM200A     | 68454681  | 68455065  | 9  | 384  | -2.402591926 | -5.460671654 | hypo |
| KRT13        | 41709890  | 41710111  | 19 | 221  | -4.155231931 | -5.414431619 | hypo |
| PCDHGA2      | 52475421  | 52477308  | 7  | 1887 | -2.422778031 | -5.407114581 | hypo |
| LRIF1        | 32422621  | 32422992  | 3  | 371  | -1.79531659  | -6.983175085 | hypo |
| CHAMP1       | 87093771  | 87094760  | 12 | 989  | -1.413052    | -6.328587726 | hypo |
| GPRIN2       | 41806021  | 41806760  | 28 | 739  | -2.598602177 | -5.382240411 | hypo |
| STRC         | 55328392  | 55328600  | 21 | 208  | -2.212250411 | -7.258847465 | hypo |
| TCF25        | 14701503  | 14702859  | 18 | 1356 | -1.04043754  | -5.821068414 | hypo |
| VCIPI1       | 30874681  | 30875540  | 14 | 859  | -1.036818809 | -6.57334592  | hypo |
| PHTF1        | 29706942  | 29707440  | 3  | 498  | -3.187214911 | -7.137985004 | hypo |
| SNX21        | 74603372  | 74603718  | 13 | 346  | -1.726104602 | -5.174126345 | hypo |
| TRAF1        | 110293205 | 110294512 | 8  | 1307 | -1.817793374 | -5.802746311 | hypo |
| PCDHGC3      | 52566741  | 52567720  | 7  | 979  | -7.965207091 | -6.958643647 | hypo |
| MOSMO        | 19764263  | 19764850  | 25 | 587  | -2.155423154 | -6.083387851 | hypo |
| DHX34        | 54344441  | 54345193  | 18 | 752  | -1.116312686 | -7.532409377 | hypo |
| CARD6        | 33637447  | 33637996  | 20 | 549  | -3.563168344 | -5.457218937 | hypo |
| SEMA4G       | 21820741  | 21821593  | 26 | 852  | -1.323220125 | -5.009570563 | hypo |
| TRIM21       | 50647717  | 50648540  | 15 | 823  | -1.246467651 | -7.565639482 | hypo |
| GLCE         | 16131996  | 16132242  | 10 | 246  | -1.775243957 | -5.921737609 | hypo |
| NFE2L3       | 69781993  | 69782640  | 4  | 647  | -2.797915226 | -5.057419325 | hypo |
| LOC112441510 | 41825621  | 41825842  | 19 | 221  | -2.153122697 | -6.151427734 | hypo |
| PTPN9        | 33375361  | 33375780  | 21 | 419  | -2.634775467 | -6.242799973 | hypo |
| ADAMTS6      | 14330174  | 14330620  | 20 | 446  | -1.5325465   | -5.054936536 | hypo |
| CLDN1        | 76988870  | 76989200  | 1  | 330  | -1.390998824 | -7.003869027 | hypo |
| MUC1         | 15428467  | 15429801  | 3  | 1334 | -2.655186216 | -5.352974387 | hypo |
| SMAD1        | 12741781  | 12742156  | 17 | 375  | -1.436372717 | -6.832917269 | hypo |
| RIN1         | 44383561  | 44384582  | 29 | 1021 | -1.432959407 | -7.083676092 | hypo |
| UVSSA        | 117094321 | 117094780 | 6  | 459  | -1.122105588 | -5.294532087 | hypo |
| IDUA         | 117373047 | 117374376 | 6  | 1329 | -1.934736069 | -6.684037536 | hypo |
| ZNF398       | 112279369 | 112280860 | 4  | 1491 | -1.463654858 | -5.538802998 | hypo |
| PCDH1        | 52948775  | 52949638  | 7  | 863  | -1.177985047 | -6.281373935 | hypo |
| CRBN         | 23146499  | 23147060  | 22 | 561  | -1.559709958 | -5.591665022 | hypo |
| SH3PXD2A     | 24166221  | 24166800  | 26 | 579  | -1.694586992 | -5.769384705 | hypo |
| N4BP2L2      | 28577468  | 28578140  | 12 | 672  | -1.051988925 | -5.432997526 | hypo |
| MYH15        | 53174438  | 53174828  | 1  | 390  | -2.928074779 | -5.167281852 | hypo |
| SALL2        | 25652541  | 25653800  | 10 | 1259 | -2.50385945  | -6.766900007 | hypo |
| TP63         | 77479319  | 77479574  | 1  | 255  | -1.703251754 | -5.665424125 | hypo |
| ASTE1        | 138840061 | 138841064 | 1  | 1003 | -1.287415803 | -6.31929049  | hypo |
| UBR2         | 16361542  | 16362300  | 23 | 758  | -1.05422618  | -6.480541112 | hypo |
| YPEL1        | 72080615  | 72080980  | 17 | 365  | -3.479142045 | -6.060052857 | hypo |
| TPGS1        | 43164861  | 43165361  | 7  | 500  | -1.309272352 | -6.249598666 | hypo |
| NAT1         | 39014461  | 39015140  | 27 | 679  | -3.273164805 | -5.942142347 | hypo |
| PDE4B        | 78958721  | 78959471  | 3  | 750  | -1.704206145 | -6.850013239 | hypo |
| TMEM203      | 106223225 | 106224140 | 11 | 915  | -1.220738803 | -5.857285863 | hypo |
| RPP38        | 29679318  | 29680560  | 13 | 1242 | -1.220195609 | -7.341833718 | hypo |

|              |           |           |    |      |              |              |      |
|--------------|-----------|-----------|----|------|--------------|--------------|------|
| TNRC18       | 38944607  | 38944850  | 25 | 243  | -1.013385563 | -6.706896692 | hypo |
| KMT2E        | 46268266  | 46268531  | 4  | 265  | -1.245480708 | -6.931166998 | hypo |
| CERK         | 116906780 | 116908480 | 5  | 1700 | -1.134931895 | -6.330540303 | hypo |
| PCF11        | 12495140  | 12495580  | 29 | 440  | -2.141962648 | -6.660407555 | hypo |
| DCUN1D1      | 84074647  | 84075140  | 1  | 493  | -1.074866306 | -6.69501786  | hypo |
| BMF          | 35754174  | 35754471  | 10 | 297  | -2.062622043 | -5.287332853 | hypo |
| AIF1         | 27685442  | 27685653  | 23 | 211  | -3.157721968 | -5.683351699 | hypo |
| C10H14orf93  | 21849321  | 21850363  | 10 | 1042 | -1.656517875 | -5.289669241 | hypo |
| C23H6orf47   | 27641181  | 27641451  | 23 | 270  | -2.608571128 | -5.41183942  | hypo |
| HARBI1       | 76569121  | 76569720  | 15 | 599  | -1.489270886 | -5.042152307 | hypo |
| CCDC191      | 58715859  | 58716083  | 1  | 224  | -1.116017654 | -5.208167561 | hypo |
| PROCA1       | 20131021  | 20131814  | 19 | 793  | -1.612099049 | -7.13827839  | hypo |
| WDR81        | 22826813  | 22827503  | 19 | 690  | -1.695734634 | -6.954093232 | hypo |
| FOXP2        | 53771701  | 53772116  | 4  | 415  | -2.119424929 | -5.088390083 | hypo |
| ROBO1        | 26493566  | 26493893  | 1  | 327  | -2.072586047 | -5.597613001 | hypo |
| SLC25A29     | 65203741  | 65205094  | 21 | 1353 | -1.566469981 | -6.922222006 | hypo |
| CYP1B1       | 20471181  | 20471796  | 11 | 615  | -3.550293116 | -5.882735166 | hypo |
| TMEM79       | 14513891  | 14514620  | 3  | 729  | -1.604962715 | -6.418374982 | hypo |
| KLHDC8A      | 3105228   | 3105788   | 16 | 560  | -3.057794074 | -5.268634957 | hypo |
| SHROOM4      | 88412141  | 88412480  | 30 | 339  | -1.689093653 | -7.100232804 | hypo |
| GOLGA3       | 44454979  | 44455243  | 17 | 264  | -1.636391302 | -6.593275748 | hypo |
| EBAG9        | 54843681  | 54844133  | 14 | 452  | -1.226397947 | -5.123624426 | hypo |
| C4H7orf25    | 78145941  | 78146860  | 4  | 919  | -2.939291119 | -5.341568435 | hypo |
| CHST14       | 36077443  | 36078860  | 10 | 1417 | -1.630420676 | -6.606280203 | hypo |
| CLIP2        | 33056241  | 33057965  | 25 | 1724 | -1.411821683 | -6.276996209 | hypo |
| ADAL         | 55115708  | 55116360  | 21 | 652  | -2.364147682 | -5.492116711 | hypo |
| ZBTB37       | 55240319  | 55241279  | 16 | 960  | -1.716761323 | -6.146847502 | hypo |
| GTPBP6       | 88349645  | 88350500  | 1  | 855  | -1.765397641 | -6.005846484 | hypo |
| PCDHGA2      | 52484221  | 52484700  | 7  | 479  | -3.293932147 | -5.113289682 | hypo |
| B4GALNT3     | 107426799 | 107427604 | 5  | 805  | -2.51470301  | -5.642525922 | hypo |
| ESCO1        | 34643761  | 34644180  | 24 | 419  | -1.008217162 | -5.61081655  | hypo |
| ZMIZ1        | 34943381  | 34944480  | 28 | 1099 | -1.109646666 | -5.881933277 | hypo |
| LOC100336476 | 119448494 | 119449494 | 3  | 1000 | -3.002659008 | -7.325652253 | hypo |
| TRIM45       | 26100401  | 26100886  | 3  | 485  | -2.092495968 | -5.44091962  | hypo |
| ZBTB4        | 27134361  | 27136351  | 19 | 1990 | -1.344386806 | -6.039639081 | hypo |
| FAM198B      | 40796022  | 40797166  | 17 | 1144 | -8.433376793 | -8.013907277 | hypo |
| STK36        | 106658993 | 106659540 | 2  | 547  | -1.812731256 | -5.08637487  | hypo |
| GJD3         | 40604665  | 40605360  | 19 | 695  | -5.101194262 | -7.498581727 | hypo |
| GPR132       | 69438921  | 69439920  | 21 | 999  | -1.953831906 | -7.895354508 | hypo |
| ZADH2        | 3493621   | 3494640   | 24 | 1019 | -1.065776843 | -6.61071721  | hypo |
| AKT3         | 33633372  | 33633720  | 16 | 348  | -1.037754067 | -6.425189091 | hypo |
| RALGAPA1     | 45883181  | 45883560  | 21 | 379  | -2.242124486 | -6.05411965  | hypo |
| MAN2A2       | 21739541  | 21741400  | 21 | 1859 | -1.442280664 | -6.564547744 | hypo |
| FHOD1        | 34861176  | 34861787  | 18 | 611  | -1.508027462 | -5.665395994 | hypo |
| ZSCAN20      | 112326941 | 112327625 | 3  | 684  | -1.972670827 | -7.399090713 | hypo |
| SALL2        | 25650788  | 25652160  | 10 | 1372 | -3.003531691 | -7.208897211 | hypo |
| ANGPTL2      | 97857492  | 97858358  | 11 | 866  | -1.492573654 | -6.181435472 | hypo |
| TACR2        | 25769941  | 25770440  | 28 | 499  | -4.063734952 | -7.942646126 | hypo |
| BDH1         | 71964601  | 71965496  | 1  | 895  | -1.114067394 | -5.447064282 | hypo |
| MARVELD1     | 18871861  | 18872335  | 26 | 474  | -1.444306373 | -5.819270701 | hypo |
| ZBTB22       | 7484861   | 7486196   | 23 | 1335 | -1.316406184 | -6.268241573 | hypo |
| TRANK1       | 10682301  | 10682720  | 22 | 419  | -3.893311446 | -6.652846044 | hypo |
| CAPN14       | 68742699  | 68743160  | 11 | 461  | -1.841192657 | -7.593869166 | hypo |
| PCLO         | 37684669  | 37685520  | 4  | 851  | -2.969704375 | -5.273516644 | hypo |
| MCIDAS       | 23913556  | 23914260  | 20 | 704  | -1.657622995 | -5.031516704 | hypo |
| ATP23        | 55516049  | 55516511  | 5  | 462  | -1.69676406  | -6.430080514 | hypo |
| TP53BP1      | 55175633  | 55176064  | 21 | 431  | -1.655073049 | -5.459025891 | hypo |
| ZC3H4        | 54112961  | 54113660  | 18 | 699  | -1.352214843 | -5.039671571 | hypo |

|              |           |           |    |      |              |              |      |
|--------------|-----------|-----------|----|------|--------------|--------------|------|
| SIX5         | 53305387  | 53306654  | 18 | 1267 | -2.818433366 | -5.079744069 | hypo |
| ZNF182       | 86423601  | 86424708  | 30 | 1107 | -1.991086034 | -5.10169936  | hypo |
| SUPT7L       | 72041499  | 72042260  | 11 | 761  | -1.08514756  | -5.073664148 | hypo |
| INTS5        | 40982521  | 40985320  | 29 | 2799 | -1.48077281  | -5.654551656 | hypo |
| AMER1        | 96142061  | 96143400  | 30 | 1339 | -1.050570793 | -6.17524855  | hypo |
| ZDHHC8       | 73011661  | 73012626  | 17 | 965  | -1.244288129 | -6.566728956 | hypo |
| APC          | 1173061   | 1173320   | 10 | 259  | -1.094070946 | -6.320642356 | hypo |
| CABIN1       | 71414149  | 71414396  | 17 | 247  | -1.361888288 | -5.094377842 | hypo |
| ZBTB4        | 27131981  | 27133020  | 19 | 1039 | -1.786193996 | -6.800243593 | hypo |
| DBP          | 55275373  | 55275585  | 18 | 212  | -1.307119818 | -5.167211635 | hypo |
| ZNF268       | 44224381  | 44225400  | 17 | 1019 | -4.015483157 | -6.067851427 | hypo |
| SMAGP        | 28546341  | 28546720  | 5  | 379  | -2.031487301 | -5.073829018 | hypo |
| SNX19        | 36942604  | 36943660  | 29 | 1056 | -1.684354844 | -6.903317661 | hypo |
| VEZF1        | 8777581   | 8778043   | 19 | 462  | -1.104203476 | -6.262974369 | hypo |
| LOC101903326 | 1089721   | 1090900   | 14 | 1179 | -8.185866545 | -8.599141382 | hypo |
| LRIG3        | 54611526  | 54612140  | 5  | 614  | -1.598882078 | -7.424563042 | hypo |
| SYNPO        | 61990227  | 61990886  | 7  | 659  | -7.712870868 | -5.179964979 | hypo |
| LRP8         | 92996821  | 92997920  | 3  | 1099 | -1.911562486 | -6.641337651 | hypo |
| PARD6G       | 417041    | 417580    | 24 | 539  | -2.865413077 | -6.26844025  | hypo |
| ERCC6L2      | 82710593  | 82711080  | 8  | 487  | -2.420857534 | -5.712036444 | hypo |
| GOLGA3       | 44439887  | 44440546  | 17 | 659  | -1.286830145 | -5.32603928  | hypo |
| HOXA10       | 68870601  | 68871860  | 4  | 1259 | -1.655883231 | -5.61945221  | hypo |
| TOM1         | 73588341  | 73588704  | 5  | 363  | -1.300509111 | -5.094223376 | hypo |
| FAM83H       | 1033018   | 1033480   | 14 | 462  | -1.451452895 | -6.577720484 | hypo |
| SAA3         | 26414395  | 26414676  | 29 | 281  | -4.678938649 | -7.870458484 | hypo |
| FER          | 108280477 | 108281780 | 7  | 1303 | -1.026604427 | -5.173130883 | hypo |
| EBP          | 86661606  | 86662086  | 30 | 480  | -1.579874296 | -5.01099967  | hypo |
| ZNF286A      | 33083301  | 33083940  | 19 | 639  | -1.513041649 | -5.259754432 | hypo |
| FLYWCH1      | 2364501   | 2366051   | 25 | 1550 | -3.229419688 | -5.229570119 | hypo |
| ISLR         | 34510341  | 34511691  | 21 | 1350 | -4.065250008 | -5.661522121 | hypo |
| TCF12        | 53036100  | 53036333  | 10 | 233  | -1.362933767 | -5.108790084 | hypo |
| PREP         | 44707851  | 44708317  | 9  | 466  | -1.138996931 | -7.693775959 | hypo |
| FAM110A      | 60259693  | 60261216  | 13 | 1523 | -1.312314515 | -7.277462516 | hypo |
| ROBO1        | 26125640  | 26125949  | 1  | 309  | -2.503694639 | -5.158950942 | hypo |
| TLDC1        | 10689521  | 10690146  | 18 | 625  | -1.168173077 | -6.88389249  | hypo |
| EXOSC6       | 1814581   | 1815582   | 18 | 1001 | -1.331880113 | -5.678944267 | hypo |
| PCDHB14      | 52329821  | 52330880  | 7  | 1059 | -2.477201141 | -7.378733712 | hypo |
| CREB3L2      | 101604041 | 101604660 | 4  | 619  | -2.29406147  | -5.055001021 | hypo |
| RUFY1        | 1706055   | 1706660   | 7  | 605  | -1.111399641 | -5.247035608 | hypo |
| SESN3        | 15268541  | 15268880  | 15 | 339  | -2.356660364 | -5.320770334 | hypo |
| ZSCAN29      | 55110901  | 55111660  | 21 | 759  | -1.828537889 | -5.200651757 | hypo |
| ZC3H4        | 54135238  | 54135458  | 18 | 220  | -1.032562344 | -6.268631946 | hypo |
| PPP2R3A      | 133118641 | 133119340 | 1  | 699  | -2.314378754 | -5.185925822 | hypo |
| LOC104975635 | 3168181   | 3168640   | 23 | 459  | -1.700666183 | -5.251204909 | hypo |
| PARP9        | 66978801  | 66979400  | 1  | 599  | -3.490769049 | -6.68289183  | hypo |
| ZC3H4        | 54113761  | 54115489  | 18 | 1728 | -2.039994088 | -5.641858331 | hypo |
| PASK         | 120343486 | 120343686 | 3  | 200  | -3.360518757 | -6.984099157 | hypo |
| NOL8         | 83941901  | 83942600  | 8  | 699  | -1.935988792 | -7.579176722 | hypo |
| KIAA1324     | 34199841  | 34200300  | 3  | 459  | -2.222783449 | -5.378593865 | hypo |
| ARHGAP26     | 54278658  | 54279120  | 7  | 462  | -2.896007579 | -7.093588093 | hypo |
| ZNF469       | 13699381  | 13703480  | 18 | 4099 | -2.297107969 | -5.155458227 | hypo |
| BTBD8        | 51230121  | 51230808  | 3  | 687  | -1.808336949 | -5.56788591  | hypo |
| NCOA1        | 74447901  | 74448580  | 11 | 679  | -1.011398005 | -5.328092565 | hypo |
| BORCS8       | 4077657   | 4077983   | 7  | 326  | -1.681221652 | -6.063166433 | hypo |
| GSTT4        | 71311337  | 71311952  | 17 | 615  | -1.987698405 | -5.537218365 | hypo |
| KCNH3        | 30274162  | 30275134  | 5  | 972  | -3.098711765 | -5.783863863 | hypo |
| MOSPD3       | 35950130  | 35950348  | 25 | 218  | -2.111591691 | -6.453927105 | hypo |
| PRKCQ        | 17098880  | 17099700  | 13 | 820  | -1.411434089 | -5.013256633 | hypo |

|              |           |           |                    |      |              |              |      |
|--------------|-----------|-----------|--------------------|------|--------------|--------------|------|
| MTAP         | 22191061  | 22191416  | 8                  | 355  | -1.165928246 | -5.155670913 | hypo |
| DHRS13       | 20269721  | 20270298  | 19                 | 577  | -1.318747286 | -5.056719268 | hypo |
| EIF4G3       | 131836841 | 131837400 | 2                  | 559  | -1.581789998 | -5.455774094 | hypo |
| ATP7B        | 21342221  | 21343194  | 12                 | 973  | -2.13195548  | -5.470121962 | hypo |
| MORN4        | 18795096  | 18795580  | 26                 | 484  | -2.404251078 | -6.506849979 | hypo |
| MALT1        | 57838779  | 57839540  | 24                 | 761  | -1.58516742  | -7.189160602 | hypo |
| ZMIZ1        | 34941312  | 34942940  | 28                 | 1628 | -1.26629772  | -5.950900671 | hypo |
| SHROOM4      | 88426319  | 88427132  | 30                 | 813  | -1.983709344 | -7.264660404 | hypo |
| EVPL         | 55642157  | 55644365  | 19                 | 2208 | -2.606017106 | -5.012960038 | hypo |
| DHX34        | 54370900  | 54372020  | 18                 | 1120 | -2.559023101 | -7.534269074 | hypo |
| PARP9        | 66966584  | 66966860  | 1                  | 276  | -3.20056893  | -6.478738288 | hypo |
| DSEL         | 9447521   | 9450420   | 24                 | 2899 | -1.49354643  | -7.058364706 | hypo |
| TNRC18       | 38936514  | 38936875  | 25                 | 361  | -1.172395684 | -6.239376024 | hypo |
| GGTA1        | 92318021  | 92318723  | 11                 | 702  | -1.61484417  | -6.632742346 | hypo |
| IGSF3        | 26701055  | 26701306  | 3                  | 251  | -1.273120142 | -6.884857876 | hypo |
| SIK3         | 27513321  | 27513760  | 15                 | 439  | -2.036558545 | -6.282958397 | hypo |
| ZNF189       | 91129321  | 91129580  | 8                  | 259  | -1.853893961 | -7.482410857 | hypo |
| FUT1         | 55379101  | 55380140  | 18                 | 1039 | -2.311475459 | -5.472070463 | hypo |
| NLGN1        | 93147021  | 93147982  | 1                  | 961  | -2.706693377 | -5.57944571  | hypo |
| MARCH9       | 55706381  | 55707220  | 5                  | 839  | -1.099526895 | -6.676505776 | hypo |
| MC1R         | 14705621  | 14706843  | 18                 | 1222 | -3.119239136 | -5.773532998 | hypo |
| SIPA1L1      | 83203921  | 83204419  | 10                 | 498  | -1.459806296 | -6.603947491 | hypo |
| FAM83E       | 55258041  | 55258520  | 18                 | 479  | -2.219104474 | -7.699361294 | hypo |
| LOC101906012 | 94261761  | 94262500  | 3                  | 739  | -1.505653099 | -5.287175351 | hypo |
| RUSC1        | 15308641  | 15309400  | 3                  | 759  | -2.328773636 | -5.319044925 | hypo |
| ARAP2        | 55608561  | 55608853  | 6                  | 292  | -1.340539298 | -5.471956028 | hypo |
| SHISA7       | 62076261  | 62077587  | 18                 | 1326 | -1.33432894  | -5.55257228  | hypo |
| ZNF449       | 18980027  | 18980914  | 30                 | 887  | -1.282926923 | -5.981374684 | hypo |
| MUC4         | 70483861  | 70484450  | 1                  | 589  | -7.793765857 | -6.702189312 | hypo |
| LOC112445746 | 11309     | 11703     | NW_020<br>191998.1 | 394  | -3.547019007 | -7.50479626  | hypo |
| CYS1         | 87542501  | 87543400  | 11                 | 899  | -3.6508429   | -5.738182438 | hypo |
| ZKSCAN2      | 22823901  | 22824936  | 25                 | 1035 | -2.827649077 | -6.000402788 | hypo |
| FBN1         | 61917881  | 61918380  | 10                 | 499  | -4.493933407 | -7.753869286 | hypo |
| TTC3         | 149402721 | 149403200 | 1                  | 479  | -1.542078288 | -6.761627839 | hypo |
| TTLL5        | 87024395  | 87024702  | 10                 | 307  | -1.506425667 | -6.763822302 | hypo |
| SPG11        | 102989879 | 102990633 | 10                 | 754  | -1.270277873 | -5.984717378 | hypo |
| RABEP1       | 26176717  | 26177185  | 19                 | 468  | -1.062198585 | -5.015097962 | hypo |
| PCLO         | 37659401  | 37660545  | 4                  | 1144 | -2.115771768 | -5.126500775 | hypo |
| LOC532048    | 60808150  | 60808400  | 18                 | 250  | -2.286226125 | -6.596751884 | hypo |
| FICD         | 64408381  | 64409320  | 17                 | 939  | -1.756610123 | -5.526420361 | hypo |
| KIF1B        | 43255541  | 43256100  | 16                 | 559  | -1.332595922 | -5.456252775 | hypo |
| ZNF200       | 2679801   | 2681166   | 25                 | 1365 | -2.44839975  | -5.010121028 | hypo |
| NRP2         | 94123960  | 94124440  | 2                  | 480  | -1.338587787 | -6.174464016 | hypo |
| LOC516355    | 102950131 | 102950380 | 4                  | 249  | -1.026208058 | -6.606666983 | hypo |
| LZTS2        | 21838972  | 21839635  | 26                 | 663  | -1.965097041 | -6.378612814 | hypo |
| LOC100297097 | 17958992  | 17959460  | 13                 | 468  | -2.025344438 | -7.397768334 | hypo |
| ARID1B       | 93840889  | 93842840  | 9                  | 1951 | -1.051911681 | -5.236540253 | hypo |
| LOC787287    | 63817742  | 63818800  | 18                 | 1058 | -1.729810729 | -6.978085917 | hypo |
| SETD1B       | 53483054  | 53484311  | 17                 | 1257 | -1.161364004 | -6.215453633 | hypo |
| TNS2         | 26907401  | 26908263  | 5                  | 862  | -1.453478576 | -5.63650122  | hypo |
| PGGHG        | 82957138  | 82957422  | 11                 | 284  | -1.504988347 | -5.124377735 | hypo |
| SZT2         | 102575891 | 102576600 | 3                  | 709  | -1.421309873 | -7.507527612 | hypo |
| CD70         | 17908292  | 17908687  | 7                  | 395  | -4.123315033 | -5.401425235 | hypo |
| ARSI         | 61646441  | 61648420  | 7                  | 1979 | -2.542125141 | -5.602169892 | hypo |
| MICALL2      | 41472809  | 41473553  | 25                 | 744  | -1.758222199 | -6.557991593 | hypo |
| PRPF38A      | 93935321  | 93935880  | 3                  | 559  | -1.392711413 | -6.1382219   | hypo |
| FAM167A      | 7911590   | 7912388   | 8                  | 798  | -3.163299525 | -5.152518678 | hypo |

|              |           |           |    |      |              |              |      |
|--------------|-----------|-----------|----|------|--------------|--------------|------|
| LYN          | 23243338  | 23244380  | 14 | 1042 | -1.037069536 | -7.082967537 | hypo |
| HTRA2        | 10107232  | 10107589  | 11 | 357  | -1.60384472  | -7.087516202 | hypo |
| PRR14L       | 70364021  | 70364753  | 17 | 732  | -1.080747414 | -6.649752678 | hypo |
| WDR81        | 22819753  | 22822880  | 19 | 3127 | -1.353419518 | -6.169329856 | hypo |
| SAP30L       | 65733201  | 65733920  | 7  | 719  | -1.491651165 | -5.533731948 | hypo |
| PGGHG        | 82961790  | 82963240  | 11 | 1450 | -1.926095737 | -6.176295862 | hypo |
| ETV6         | 97960096  | 97960642  | 5  | 546  | -1.778991683 | -7.276602446 | hypo |
| TFCP2        | 28610703  | 28611380  | 5  | 677  | -1.443032035 | -5.00002487  | hypo |
| WNT5A        | 45560361  | 45560680  | 22 | 319  | -3.367045188 | -6.019425277 | hypo |
| LOC100848077 | 59524621  | 59525500  | 18 | 879  | -1.321365896 | -5.841489372 | hypo |
| PCDHB11      | 52338941  | 52339920  | 7  | 979  | -2.547988905 | -5.332091248 | hypo |
| RHOBTB1      | 16652278  | 16653200  | 28 | 922  | -2.572190438 | -7.080016995 | hypo |
| ZNF845       | 60674241  | 60675640  | 18 | 1399 | -1.756258124 | -6.813532615 | hypo |
| EPB41        | 124429501 | 124430620 | 2  | 1119 | -1.049811655 | -5.067542585 | hypo |
| CCDC174      | 57604753  | 57605500  | 22 | 747  | -1.86822097  | -5.190196033 | hypo |
| WDFY3        | 99508341  | 99508755  | 6  | 414  | -1.772911405 | -7.636343146 | hypo |
| MPV17        | 72334141  | 72334888  | 11 | 747  | -1.701597941 | -5.354818874 | hypo |
| PPFIBP2      | 45058386  | 45059040  | 15 | 654  | -3.390667686 | -7.202454024 | hypo |
| ZFHx2        | 21422357  | 21424370  | 10 | 2013 | -2.388820976 | -5.314614755 | hypo |
| PLPP6        | 39863786  | 39864900  | 8  | 1114 | -1.000571176 | -5.130748453 | hypo |
| CPLANE1      | 37096128  | 37096899  | 20 | 771  | -1.053174629 | -5.424759079 | hypo |
| EXT1         | 46477327  | 46477877  | 14 | 550  | -1.038692741 | -6.069890453 | hypo |
| FRMPD1       | 61862721  | 61863900  | 8  | 1179 | -1.805209744 | -5.279038399 | hypo |
| STX1A        | 33560661  | 33561036  | 25 | 375  | -1.26120022  | -5.480237521 | hypo |
| FOCAD        | 23422421  | 23422820  | 8  | 399  | -1.919045596 | -5.482705627 | hypo |
| KLHL9        | 22874801  | 22876560  | 8  | 1759 | -1.56027277  | -6.033022278 | hypo |
| WDR81        | 22830569  | 22831945  | 19 | 1376 | -1.345204477 | -5.086579453 | hypo |
| ZC3HAV1      | 102679043 | 102679380 | 4  | 337  | -1.584962501 | -5.536852441 | hypo |
| SAMD12       | 46065686  | 46065920  | 14 | 234  | -1.477282582 | -5.128218775 | hypo |
| ZNF789       | 36878521  | 36879300  | 25 | 779  | -1.975044053 | -6.91604302  | hypo |
| ZMYM4        | 110326881 | 110327740 | 3  | 859  | -3.977457431 | -7.64098269  | hypo |
| SETDB1       | 19805609  | 19806238  | 3  | 629  | -1.380887624 | -6.312945753 | hypo |
| SIK3         | 27511921  | 27512400  | 15 | 479  | -2.206272756 | -5.098118791 | hypo |
| KBTBD4       | 77375279  | 77375951  | 15 | 672  | -1.098985145 | -6.575658002 | hypo |
| ZSCAN2       | 22287721  | 22288820  | 21 | 1099 | -1.369543535 | -5.260220049 | hypo |
| PLD1         | 95908536  | 95909140  | 1  | 604  | -1.785948004 | -6.680327852 | hypo |
| NFKB1        | 22206181  | 22206821  | 6  | 640  | -1.834379338 | -5.113104831 | hypo |
| C2H2orf88    | 6102081   | 6103720   | 2  | 1639 | -1.867005372 | -5.36464447  | hypo |
| PARD6G       | 415912    | 417000    | 24 | 1088 | -1.250347307 | -5.683975273 | hypo |
| PTPN22       | 29558841  | 29559607  | 3  | 766  | -2.013840351 | -5.278299193 | hypo |
| TMEM185B     | 71939541  | 71940200  | 2  | 659  | -1.721851783 | -6.880071341 | hypo |
| ERCC5        | 79094828  | 79095900  | 12 | 1072 | -1.757242245 | -6.75822574  | hypo |
| CC2D1B       | 94016481  | 94017100  | 3  | 619  | -1.387587521 | -6.074239035 | hypo |
| NFIX         | 12481181  | 12482481  | 7  | 1300 | -1.838097261 | -6.667350315 | hypo |
| MLLT3        | 24068581  | 24069260  | 8  | 679  | -1.725403308 | -5.359236354 | hypo |
| CMTR2        | 39767901  | 39768340  | 18 | 439  | -1.421534643 | -5.238920956 | hypo |
| KIAA1614     | 62071241  | 62072515  | 16 | 1274 | -1.754665268 | -6.111295032 | hypo |
| VIRMA        | 69815521  | 69815927  | 14 | 406  | -1.310846634 | -5.334324909 | hypo |
| FAM208A      | 44393695  | 44394060  | 22 | 365  | -1.939147035 | -7.408142407 | hypo |
| HS3ST3B1     | 32264651  | 32265270  | 19 | 619  | -2.004668308 | -6.458992835 | hypo |
| YLPM1        | 86060450  | 86060871  | 10 | 421  | -1.110183783 | -6.093068895 | hypo |
| ZNF132       | 65693781  | 65694455  | 18 | 674  | -1.752457237 | -6.394102633 | hypo |
| TNFRSF25     | 46908824  | 46909417  | 16 | 593  | -4.337766688 | -7.187647659 | hypo |
| UBP1         | 7649241   | 7649991   | 22 | 750  | -1.041009353 | -6.0305962   | hypo |
| ZNF605       | 43972301  | 43973780  | 17 | 1479 | -1.791579769 | -7.12691327  | hypo |
| LOC784522    | 12216821  | 12218697  | 26 | 1876 | -2.470528584 | -6.361663672 | hypo |
| PCDH18       | 20290381  | 20290908  | 17 | 527  | -1.921015325 | -5.2606468   | hypo |
| SHROOM4      | 88412621  | 88413580  | 30 | 959  | -1.849105865 | -5.296343782 | hypo |

|              |           |           |                |      |              |              |      |
|--------------|-----------|-----------|----------------|------|--------------|--------------|------|
| LOC101905343 | 25527701  | 25528780  | 2              | 1079 | -1.134142105 | -5.941930567 | hypo |
| NAV2         | 25041774  | 25042045  | 29             | 271  | -1.614497715 | -5.072313202 | hypo |
| ADPRHL2      | 109722182 | 109722992 | 3              | 810  | -1.127602232 | -5.55557217  | hypo |
| SPATS2       | 30304741  | 30305269  | 5              | 528  | -2.119265838 | -5.920726315 | hypo |
| MOGS         | 10165893  | 10166380  | 11             | 487  | -1.567416509 | -5.071111014 | hypo |
| ASF1A        | 32129036  | 32129436  | 9              | 400  | -1.255036428 | -6.456389184 | hypo |
| RCOR3        | 72057761  | 72058324  | 16             | 563  | -1.22610017  | -5.927480677 | hypo |
| ZNF713       | 27636033  | 27637120  | 25             | 1087 | -1.796805841 | -5.360633762 | hypo |
| VDR          | 32437828  | 32438880  | 5              | 1052 | -1.758546638 | -6.831549324 | hypo |
| ZNF22        | 44581021  | 44582051  | 28             | 1030 | -2.160427753 | -6.305640573 | hypo |
| CPT2         | 93033301  | 93033606  | 3              | 305  | -1.898002932 | -5.591004986 | hypo |
| TET3         | 10560181  | 10560900  | 11             | 719  | -1.094115398 | -5.810308735 | hypo |
| CYBA         | 13886181  | 13886491  | 18             | 310  | -1.142162566 | -6.698045897 | hypo |
| FAM171A2     | 44156310  | 44158316  | 19             | 2006 | -1.955278762 | -7.129590479 | hypo |
| ANGPTL2      | 97836861  | 97837389  | 11             | 528  | -1.841814236 | -6.311450621 | hypo |
| BRWD1        | 139253289 | 139253960 | 1              | 671  | -1.293028209 | -5.304708877 | hypo |
| ZNF677       | 60082521  | 60083120  | 18             | 599  | -2.145293024 | -6.762711992 | hypo |
| OXSM         | 40008565  | 40009574  | 27             | 1009 | -2.882239487 | -6.923826387 | hypo |
| ZNFX1        | 77366692  | 77367200  | 13             | 508  | -1.509058724 | -6.354033209 | hypo |
| SYNJ1        | 2915798   | 2916780   | 1              | 982  | -1.449840471 | -5.047095304 | hypo |
| NHS          | 125753461 | 125754271 | 30             | 810  | -1.510065391 | -6.87910208  | hypo |
| FUT8         | 77837149  | 77837940  | 10             | 791  | -1.68395551  | -5.45631924  | hypo |
| KIAA1549     | 102495221 | 102495859 | 4              | 638  | -2.546044968 | -7.335426076 | hypo |
| INTS3        | 16663861  | 16664160  | 3              | 299  | -1.535817918 | -5.16622856  | hypo |
| F8A1         | 36138941  | 36140040  | 30             | 1099 | -1.82812328  | -5.593360073 | hypo |
| TCP11L2      | 69711261  | 69711600  | 5              | 339  | -2.456224954 | -5.456683889 | hypo |
| ZBTB11       | 46058301  | 46059580  | 1              | 1279 | -1.55140549  | -6.166907899 | hypo |
| SRRM3        | 34334483  | 34334699  | 25             | 216  | -4.416848429 | -7.685253748 | hypo |
| ZFP2         | 2442161   | 2442760   | 7              | 599  | -2.58601181  | -7.07360888  | hypo |
| NUCB1        | 55503181  | 55503527  | 18             | 346  | -1.148524404 | -6.431432095 | hypo |
| KIAA1614     | 62047625  | 62048572  | 16             | 947  | -1.902766181 | -7.304857106 | hypo |
| PTPRK        | 66134475  | 66134778  | 9              | 303  | -1.228675842 | -5.949814846 | hypo |
| KLHL23       | 26587610  | 26588100  | 2              | 490  | -2.192162491 | -7.472420669 | hypo |
| PPP1R14D     | 36376515  | 36376860  | 10             | 345  | -4.03087038  | -6.178439924 | hypo |
| GPR156       | 64940401  | 64941080  | 1              | 679  | -3.67556505  | -6.052307337 | hypo |
| LOC112445429 | 14096     | 14660     | NW_020190482.1 | 564  | -1.305793035 | -6.146647042 | hypo |
| HECTD4       | 62005521  | 62006686  | 17             | 1165 | -1.413643743 | -6.999264807 | hypo |
| ARL2         | 43234563  | 43235043  | 29             | 480  | -2.379667874 | -6.949690924 | hypo |
| PLEKHG2      | 49115882  | 49116816  | 18             | 934  | -1.397002154 | -6.149973492 | hypo |
| DTX3L        | 66994784  | 66995002  | 1              | 218  | -2.371364934 | -6.504368966 | hypo |
| TSPAN1       | 99895915  | 99896260  | 3              | 345  | -2.166326359 | -6.874737124 | hypo |
| DTX3L        | 66993241  | 66993720  | 1              | 479  | -3.236090326 | -7.504498637 | hypo |
| ATP10D       | 66270553  | 66271220  | 6              | 667  | -1.809520361 | -5.79662107  | hypo |
| DCLRE1C      | 29553801  | 29555340  | 13             | 1539 | -1.106832312 | -6.978259774 | hypo |
| PCDH12       | 53008891  | 53009738  | 7              | 847  | -1.637173738 | -5.079428649 | hypo |
| LOC104970105 | 2782712   | 2783520   | 25             | 808  | -1.054560718 | -5.267153268 | hypo |
| DBN1         | 38954058  | 38954360  | 7              | 302  | -1.647320942 | -5.128063052 | hypo |
| FZD6         | 61184381  | 61184680  | 14             | 299  | -1.383375207 | -6.008190152 | hypo |
| TGFB2        | 21807923  | 21808180  | 16             | 257  | -1.229515678 | -6.013815749 | hypo |
| HOXC8        | 26021041  | 26021532  | 5              | 491  | -1.218809245 | -6.716562014 | hypo |
| SLC2A4RG     | 54030865  | 54031282  | 13             | 417  | -1.323238835 | -6.71844099  | hypo |
| ARID2        | 34310481  | 34310919  | 5              | 438  | -1.82907946  | -5.141328181 | hypo |
| GPRIN2       | 41806801  | 41807620  | 28             | 819  | -2.610655368 | -6.560140554 | hypo |
| CCDC189      | 26877781  | 26878800  | 25             | 1019 | -2.096187655 | -5.589127657 | hypo |
| ADGRF4       | 20759361  | 20759820  | 23             | 459  | -2.68817574  | -7.19016824  | hypo |
| VPS13B       | 64695041  | 64695553  | 14             | 512  | -1.211183463 | -7.569930341 | hypo |
| INHBA        | 79299011  | 79300035  | 4              | 1024 | -1.056397969 | -6.607200373 | hypo |

|              |           |           |    |      |              |              |      |
|--------------|-----------|-----------|----|------|--------------|--------------|------|
| SRRM3        | 34336510  | 34337240  | 25 | 730  | -4.967674472 | -7.658777766 | hypo |
| NAPEPLD      | 44436564  | 44437208  | 4  | 644  | -1.545951836 | -5.222729343 | hypo |
| IRGQ         | 51818486  | 51819018  | 18 | 532  | -1.230959816 | -5.797114831 | hypo |
| CYS1         | 87541766  | 87542340  | 11 | 574  | -2.970996042 | -6.077337266 | hypo |
| TTC22        | 91512013  | 91513040  | 3  | 1027 | -1.399351141 | -6.819324733 | hypo |
| CELSR3       | 51222421  | 51224420  | 22 | 1999 | -2.885878391 | -6.101607307 | hypo |
| ST5          | 43870361  | 43870820  | 15 | 459  | -2.000801275 | -5.360572106 | hypo |
| PCDHGA2      | 52598321  | 52598880  | 7  | 559  | -2.284203313 | -5.443723859 | hypo |
| ZBTB26       | 94084541  | 94085840  | 11 | 1299 | -1.60621178  | -5.148198428 | hypo |
| IRGQ         | 51811817  | 51812400  | 18 | 583  | -1.755081046 | -7.750878501 | hypo |
| PRAP1        | 25655737  | 25656280  | 26 | 543  | -2.345430215 | -5.658133876 | hypo |
| ZBED5        | 41820501  | 41820840  | 15 | 339  | -2.506301415 | -6.422712498 | hypo |
| PLEKHG2      | 49107835  | 49108696  | 18 | 861  | -1.119083353 | -6.409447584 | hypo |
| LOC104975673 | 30493866  | 30494845  | 23 | 979  | -2.591328011 | -6.482814488 | hypo |
| RTL6         | 115129301 | 115130186 | 5  | 885  | -1.046964104 | -5.732550572 | hypo |
| TIAM1        | 4271792   | 4272766   | 1  | 974  | -1.210782111 | -6.952112098 | hypo |
| KDELC2       | 18149061  | 18149489  | 15 | 428  | -1.989139007 | -7.032216943 | hypo |
| ZNF213       | 2580651   | 2582195   | 25 | 1544 | -1.640130783 | -5.379290104 | hypo |
| NEK9         | 86332661  | 86333213  | 10 | 552  | -1.286280501 | -5.348894324 | hypo |
| NDE1         | 14127981  | 14128660  | 25 | 679  | -3.176308618 | -5.663435339 | hypo |
| ZNF329       | 65518956  | 65520500  | 18 | 1544 | -1.314559785 | -5.760795727 | hypo |
| TUBA1D       | 107219456 | 107220160 | 2  | 704  | -1.953958959 | -5.427249029 | hypo |
| FOXN1        | 20003597  | 20004560  | 19 | 963  | -3.170344024 | -7.699819358 | hypo |
| TTC30A       | 19259701  | 19261400  | 2  | 1699 | -2.89736095  | -7.318116573 | hypo |
| HOMER3       | 4283881   | 4284203   | 7  | 322  | -1.588767305 | -5.153935728 | hypo |
| WDR89        | 75839121  | 75839720  | 10 | 599  | -1.856383258 | -5.390394747 | hypo |
| OVOL2        | 38271781  | 38272471  | 13 | 690  | -1.911679323 | -7.46834744  | hypo |
| LOC524576    | 74499515  | 74500000  | 5  | 485  | -1.893133856 | -5.546550048 | hypo |
| KDF1         | 126266880 | 126267951 | 2  | 1071 | -1.178408665 | -6.317115192 | hypo |
| LIF          | 69261181  | 69262100  | 17 | 919  | -1.930467922 | -5.106914193 | hypo |
| CREBBP       | 3055321   | 3057629   | 25 | 2308 | -1.060391348 | -6.31066176  | hypo |
| DNAJC22      | 30470980  | 30471296  | 5  | 316  | -1.416234686 | -5.665826168 | hypo |
| POU6F1       | 28588992  | 28589246  | 5  | 254  | -3.317304068 | -6.626699314 | hypo |
| RBM33        | 117462753 | 117463240 | 4  | 487  | -1.444293391 | -6.897255794 | hypo |
| SLC10A3      | 37548361  | 37549254  | 30 | 893  | -1.14577129  | -6.414725409 | hypo |
| LOC107133032 | 18206301  | 18207113  | 13 | 812  | -2.419450764 | -5.163505765 | hypo |
| EGR2         | 18936461  | 18938246  | 28 | 1785 | -1.049677025 | -6.979723747 | hypo |
| FAT2         | 62773421  | 62774540  | 7  | 1119 | -2.6990983   | -5.20374486  | hypo |
| TCF7         | 45799283  | 45800060  | 7  | 777  | -1.853431218 | -7.023210759 | hypo |
| ADAMTS6      | 14330961  | 14331260  | 20 | 299  | -2.746369005 | -5.582769332 | hypo |
| ARMC10       | 44425621  | 44425940  | 4  | 319  | -2.48247498  | -5.628945801 | hypo |
| SDR42E1      | 8544881   | 8545380   | 18 | 499  | -2.708298267 | -6.31592332  | hypo |
| GTF3C2       | 72320621  | 72321460  | 11 | 839  | -1.888060127 | -6.929991617 | hypo |
| BAD          | 42573697  | 42574197  | 29 | 500  | -1.350182716 | -7.314896082 | hypo |
| LOC510362    | 97042301  | 97043940  | 30 | 1639 | -1.383650611 | -6.42365898  | hypo |
| FAM21A       | 44155081  | 44155387  | 28 | 306  | -2.118298153 | -5.461863388 | hypo |
| FUT1         | 55377841  | 55378840  | 18 | 999  | -2.216382738 | -5.033724766 | hypo |
| ZNF792       | 45697061  | 45697680  | 18 | 619  | -2.406132115 | -6.324613745 | hypo |
| LOC104975635 | 3169341   | 3170140   | 23 | 799  | -1.373600948 | -6.046165067 | hypo |
| KIAA1549     | 102494167 | 102494700 | 4  | 533  | -2.364824029 | -5.871594539 | hypo |
| CUX1         | 34727021  | 34727540  | 25 | 519  | -1.15383668  | -5.020222994 | hypo |
| FMNL3        | 30201821  | 30202352  | 5  | 531  | -1.564050898 | -6.505171785 | hypo |
| DNAJC22      | 30467870  | 30468157  | 5  | 287  | -6.741466986 | -5.059383236 | hypo |
| ZC3HAV1      | 102708801 | 102709260 | 4  | 459  | -1.172149232 | -6.835831416 | hypo |
| CLCA2        | 57619160  | 57619431  | 3  | 271  | -6.855491443 | -5.060220613 | hypo |
| C18H16orf46  | 7745481   | 7746660   | 18 | 1179 | -1.630801756 | -5.090995289 | hypo |
| TRANK1       | 10682961  | 10684036  | 22 | 1075 | -4.06133106  | -5.254546377 | hypo |
| ZNF311       | 29995755  | 29996107  | 23 | 352  | -2.435468727 | -5.605562733 | hypo |



|           |           |           |    |      |              |              |      |
|-----------|-----------|-----------|----|------|--------------|--------------|------|
| LHFPL4    | 17088303  | 17088792  | 22 | 489  | -1.301083165 | -5.025924741 | hypo |
| TMEM106A  | 43175075  | 43176360  | 19 | 1285 | -1.760829487 | -5.081245653 | hypo |
| ANKRD6    | 60560601  | 60562111  | 9  | 1510 | -2.009640453 | -5.232473829 | hypo |
| SDC3      | 122701657 | 122702460 | 2  | 803  | -5.590543533 | -7.796532044 | hypo |
| ABR       | 21860276  | 21860800  | 19 | 524  | -1.144431113 | -6.01163471  | hypo |
| TRANK1    | 10681101  | 10681920  | 22 | 819  | -3.750021747 | -5.185577413 | hypo |
| PIK3IP1   | 70095301  | 70096011  | 17 | 710  | -2.379488078 | -5.479845069 | hypo |
| PCDHGA2   | 52490421  | 52491260  | 7  | 839  | -1.803407978 | -5.960235676 | hypo |
| CD40      | 74852544  | 74853121  | 13 | 577  | -2.152397835 | -6.260971718 | hypo |
| TUBB3     | 14715944  | 14716640  | 18 | 696  | -1.594845197 | -5.193277575 | hypo |
| ZNF746    | 112486621 | 112488794 | 4  | 2173 | -1.536377195 | -5.616038335 | hypo |
| ZAR1L     | 28684085  | 28685819  | 12 | 1734 | -2.927886528 | -5.253321993 | hypo |
| DDX20     | 31540261  | 31541260  | 3  | 999  | -1.330943283 | -5.890631703 | hypo |
| FAT2      | 62703103  | 62703561  | 7  | 458  | -3.140611493 | -6.121209708 | hypo |
| CENPB     | 51419141  | 51419763  | 13 | 622  | -2.619522084 | -7.518317065 | hypo |
| KAT5      | 43885842  | 43886391  | 29 | 549  | -1.185435985 | -6.042372504 | hypo |
| EPS8L1    | 62312790  | 62313019  | 18 | 229  | -1.033784946 | -7.378111098 | hypo |
| PCDHGA8   | 52474726  | 52475140  | 7  | 414  | -4.554023791 | -7.763595123 | hypo |
| EPHX1     | 28870459  | 28870961  | 16 | 502  | -2.229283252 | -7.168791379 | hypo |
| RALGAPA1  | 45843581  | 45844375  | 21 | 794  | -1.293642123 | -6.401106225 | hypo |
| LZTS2     | 21841196  | 21842320  | 26 | 1124 | -1.976481685 | -7.267072583 | hypo |
| PALM      | 43322315  | 43324385  | 7  | 2070 | -1.487316856 | -6.201014263 | hypo |
| LIPT1     | 4312941   | 4313980   | 11 | 1039 | -2.795962329 | -6.007042869 | hypo |
| ADAMTS14  | 26920556  | 26921580  | 28 | 1024 | -1.287016142 | -5.328122287 | hypo |
| NFIX      | 12547513  | 12548045  | 7  | 532  | -1.475796017 | -6.693403959 | hypo |
| MTRF1L    | 127239161 | 127239777 | 2  | 616  | -1.512630635 | -7.010627573 | hypo |
| ACSS2     | 64232901  | 64233260  | 13 | 359  | -2.249529618 | -5.3884391   | hypo |
| CCDC102A  | 25505115  | 25505325  | 18 | 210  | -2.899589619 | -5.012166142 | hypo |
| MN1       | 67217885  | 67223040  | 17 | 5155 | -4.65234543  | -5.700954586 | hypo |
| TEP1      | 26715161  | 26715680  | 10 | 519  | -1.759249454 | -7.201197757 | hypo |
| LRFN4     | 44871336  | 44872695  | 29 | 1359 | -1.142923584 | -7.141250448 | hypo |
| ZBTB33    | 4823681   | 4824000   | 30 | 319  | -1.538867528 | -5.258933973 | hypo |
| RAB3D     | 15738681  | 15739080  | 7  | 399  | -2.084839942 | -7.228452597 | hypo |
| PCLO      | 37457137  | 37458791  | 4  | 1654 | -1.485844567 | -5.59864345  | hypo |
| ATP7B     | 21375510  | 21376560  | 12 | 1050 | -1.129029253 | -6.139759995 | hypo |
| ANGPTL2   | 97839854  | 97840125  | 11 | 271  | -1.482002689 | -6.290542339 | hypo |
| TBC1D30   | 48952181  | 48953213  | 5  | 1032 | -1.259297107 | -6.378113715 | hypo |
| USP3      | 46413661  | 46413950  | 10 | 289  | -1.478432581 | -5.755140122 | hypo |
| MEGF8     | 50921903  | 50922340  | 18 | 437  | -2.040680617 | -5.295858981 | hypo |
| DAP3      | 15050241  | 15050920  | 3  | 679  | -2.066758763 | -5.880185829 | hypo |
| CEP290    | 17879243  | 17879660  | 5  | 417  | -1.256028673 | -5.221511353 | hypo |
| OSR1      | 79410776  | 79411475  | 11 | 699  | -1.279723053 | -6.351373543 | hypo |
| PALMD     | 43540938  | 43541920  | 3  | 982  | -3.292714739 | -6.632105241 | hypo |
| DTX3L     | 66993801  | 66994381  | 1  | 580  | -3.813647766 | -7.537522733 | hypo |
| ZC3H4     | 54116580  | 54116829  | 18 | 249  | -1.467545942 | -5.238910118 | hypo |
| LDB1      | 22779581  | 22780412  | 26 | 831  | -1.036832355 | -5.702229878 | hypo |
| TMEM30B   | 73389981  | 73391840  | 10 | 1859 | -1.167153374 | -6.569182975 | hypo |
| FASN      | 50794121  | 50794920  | 19 | 799  | -1.655464372 | -6.676478887 | hypo |
| NIF3L1    | 89533181  | 89533868  | 2  | 687  | -1.494586826 | -6.924459751 | hypo |
| PC        | 44863701  | 44863924  | 29 | 223  | -1.733129995 | -5.798368596 | hypo |
| TTC3      | 149402332 | 149402700 | 1  | 368  | -1.254712866 | -7.094712238 | hypo |
| FLYWCH1   | 2363721   | 2364420   | 25 | 699  | -3.48521006  | -7.691080923 | hypo |
| SERTAD4   | 73095521  | 73095760  | 16 | 239  | -1.96832754  | -5.081751266 | hypo |
| LOC786553 | 52346001  | 52346525  | 7  | 524  | -2.85278319  | -5.707387913 | hypo |
| MAP10     | 5677641   | 5678420   | 28 | 779  | -4.045610597 | -6.239357504 | hypo |
| QPCTL     | 53262235  | 53263008  | 18 | 773  | -1.001134059 | -5.525381579 | hypo |
| ZC3H4     | 54119911  | 54120255  | 18 | 344  | -1.270221129 | -7.381914747 | hypo |
| FDFT1     | 7588321   | 7589280   | 8  | 959  | -1.793128084 | -6.381981574 | hypo |

|              |           |           |    |      |              |              |      |
|--------------|-----------|-----------|----|------|--------------|--------------|------|
| PBXIP1       | 15643041  | 15644005  | 3  | 964  | -1.590752863 | -6.302860859 | hypo |
| YTHDF3       | 28171470  | 28171720  | 14 | 250  | -1.016656219 | -5.74320997  | hypo |
| MOGS         | 10166481  | 10167320  | 11 | 839  | -1.912601253 | -5.406913247 | hypo |
| KLHL9        | 22874269  | 22874740  | 8  | 471  | -1.59489585  | -7.118911638 | hypo |
| FAT2         | 62725734  | 62726545  | 7  | 811  | -3.002976062 | -6.103501077 | hypo |
| SIPA1L1      | 83237790  | 83238233  | 10 | 443  | -1.132857392 | -6.208310894 | hypo |
| NACC2        | 103552754 | 103553698 | 11 | 944  | -1.556913043 | -7.185186606 | hypo |
| TET1         | 25034841  | 25035820  | 28 | 979  | -2.505458768 | -5.104901272 | hypo |
| ICOSLG       | 144223179 | 144223740 | 1  | 561  | -1.448970294 | -5.996281267 | hypo |
| PRDM8        | 94886600  | 94888620  | 6  | 2020 | -1.234471887 | -7.259816571 | hypo |
| LOC512672    | 28498603  | 28498879  | 23 | 276  | -1.268553186 | -5.150739673 | hypo |
| CHST3        | 28097401  | 28098320  | 28 | 919  | -1.410633561 | -6.720455665 | hypo |
| KIAA0895     | 60871861  | 60872456  | 4  | 595  | -2.032677146 | -5.216999037 | hypo |
| PLCH2        | 50361621  | 50362360  | 16 | 739  | -7.51412226  | -6.25331942  | hypo |
| PCDHGA2      | 52438421  | 52438920  | 7  | 499  | -4.516249751 | -5.729243284 | hypo |
| NAB2         | 56343802  | 56344676  | 5  | 874  | -2.105475976 | -5.387127341 | hypo |
| UCN          | 72336075  | 72336639  | 11 | 564  | -2.625058382 | -5.446594191 | hypo |
| RASSF6       | 88621461  | 88621800  | 6  | 339  | -8.613605318 | -7.864766013 | hypo |
| PCDHGA2      | 52596894  | 52597320  | 7  | 426  | -1.762947983 | -5.906326869 | hypo |
| PCLO         | 37643037  | 37643796  | 4  | 759  | -1.795482179 | -5.405114796 | hypo |
| GNPAT        | 4045309   | 4045613   | 28 | 304  | -1.277438417 | -6.253082275 | hypo |
| KCTD14       | 18025501  | 18026233  | 29 | 732  | -1.506634408 | -5.059929714 | hypo |
| LOC112442214 | 58376041  | 58376770  | 18 | 729  | -1.659366749 | -5.183550439 | hypo |
| DIDO1        | 54507921  | 54508372  | 13 | 451  | -1.370940039 | -5.289865437 | hypo |
| DDX58        | 11604221  | 11604700  | 8  | 479  | -5.710218453 | -6.188151604 | hypo |
| TSPYL4       | 34447804  | 34449460  | 9  | 1656 | -1.249120422 | -6.591477955 | hypo |
| SEMA6D       | 62640841  | 62642340  | 10 | 1499 | -1.98981938  | -7.532017812 | hypo |
| SUPT7L       | 72032795  | 72033380  | 11 | 585  | -1.595892061 | -5.732618625 | hypo |
| GGT6         | 25040645  | 25042088  | 19 | 1443 | -3.041563811 | -6.081363719 | hypo |
| TP63         | 77498392  | 77498619  | 1  | 227  | -1.757153481 | -5.146424845 | hypo |
| HOMEZ        | 21625944  | 21627680  | 10 | 1736 | -2.205934451 | -5.913371788 | hypo |
| NCOA5        | 74798101  | 74798546  | 13 | 445  | -1.761929938 | -7.502291561 | hypo |
| IL17RD       | 44002624  | 44003180  | 22 | 556  | -1.477680315 | -5.271945711 | hypo |
| FOXN1        | 19991100  | 19991559  | 19 | 459  | -3.674293392 | -5.273007823 | hypo |
